1 Antimalarials in mosquitoes overcome *Anopheles* and *Plasmodium* resistance to malaria  
2 control strategies

3 Douglas G. Paton<sup>1\*</sup>, Alexandra S. Probst<sup>1</sup>, Erica Ma<sup>1</sup>, Kelsey L. Adams<sup>1</sup>, W. Robert Shaw<sup>1</sup>, Naresh  
4 Singh<sup>1</sup>, Selina Bopp<sup>1</sup>, Sarah K. Volkman<sup>1</sup>, Domombele F. S. Hien<sup>2</sup>, Prislauré S. L. Paré<sup>2</sup>, Rakiswendé  
5 S. Yerbanga<sup>2</sup>, Abdoullaye Diabaté<sup>2</sup>, Roch K. Dabiré<sup>2</sup>, Thierry Lefèvre<sup>3,4,5</sup>, Dyann F. Wirth<sup>1</sup>, Flaminia  
6 Catteruccia<sup>1\*</sup>

7

8 <sup>1</sup> Department of Immunology and Infectious Diseases, Harvard TH Chan School of Public Health,  
9 Boston, USA.

10 <sup>2</sup> Institut de Recherche en Sciences de la Santé/Centre Muraz, Bobo-Dioulasso, Burkina Faso

11 <sup>3</sup> MIVEGEC, IRD, CNRS, University of Montpellier, Montpellier, France

12 <sup>4</sup> Laboratoire mixte international sur les vecteurs (LAMIVECT), Bobo Dioulasso, Burkina Faso

13 <sup>5</sup> Centre de Recherche en Écologie et Évolution de la Santé (CREES), Montpellier, France

14 \*Corresponding Authors. Email: [fcatter@hsph.harvard.edu](mailto:fcatter@hsph.harvard.edu), [dpaton@hsph.harvard.edu](mailto:dpaton@hsph.harvard.edu)

15 **Abstract**

16 The spread of insecticide resistance in *Anopheles* mosquitoes and drug resistance in *Plasmodium*  
17 parasites is contributing to a global resurgence of malaria, making the generation of control tools that  
18 can overcome these issues an urgent public health priority. We recently showed that the transmission  
19 of *Plasmodium falciparum* parasites can be efficiently blocked when exposing *Anopheles gambiae*  
20 females to antimalarials deposited on a treated surface, with no negative consequences on mosquito  
21 fitness. Here, we demonstrate this approach can overcome the hurdles of insecticide resistance in  
22 mosquitoes and drug resistant in parasites. We show that the transmission-blocking efficacy of  
23 mosquito-targeted antimalarials is maintained when field-derived, insecticide resistant *Anopheles* are  
24 exposed to the potent cytochrome b inhibitor atovaquone, demonstrating that this drug escapes  
25 insecticide resistance mechanisms that could potentially interfere with its function. Moreover, this  
26 approach prevents transmission of field-derived, artemisinin resistant *P. falciparum* parasites (*Kelch13*  
27 C580Y mutant), proving that this strategy could be used to prevent the spread of parasite mutations  
28 that induce resistance to front-line antimalarials. Atovaquone is also highly effective at limiting  
29 parasite development when ingested by mosquitoes in sugar solutions, including in ongoing infections.  
30 These data support the use of mosquito-targeted antimalarials as a promising tool to complement and  
31 extend the efficacy of current malaria control interventions.

## 32 **Significance Statement**

33 Effective control of malaria is hampered by resistance to vector-targeted insecticides and parasite-  
34 targeted drugs. This situation is exacerbated by a critical lack of chemical diversity in both  
35 interventions and, as such, new interventions are badly needed. Recent laboratory studies have shown  
36 that an alternative approach based on treating *Anopheles* mosquitoes directly with antimalarial  
37 compounds can render the vector incapable of transmitting the *Plasmodium* parasites that cause  
38 malaria. While promising, showing that mosquito-targeted antimalarials remain effective against wild  
39 parasites and mosquitoes, including drug- and insecticide-resistant populations, respectively, is crucial  
40 to the future viability of this approach. In this study, carried out in the US and Burkina Faso, we show  
41 that antimalarial exposure is highly effective, even against extremely resistant mosquitoes, and can  
42 block transmission of drug-resistant parasites. By combining lab, and field-based studies in this way  
43 we have demonstrated that this novel approach can be effective in areas where conventional control  
44 measures are no longer as effective.

## 45 **Introduction**

46 Human malaria, a parasitic disease caused by unicellular eukaryotic *Plasmodium* parasites and spread  
47 through the bite of *Anopheles* mosquitoes, remains a substantial cause of global morbidity and  
48 mortality (1). Malaria control programs rely on preventative measures focused on mosquito control  
49 and on therapeutic measures based on the use of antimalarial drugs. Mosquito-targeted interventions  
50 are the most effective tools at reducing the transmission of *Plasmodium* parasites, with long-lasting  
51 insecticide-impregnated nets (LLINs) and indoor residuals spraying (IRS) as primary methods for  
52 malaria prevention. LLINs alone are predicted to have contributed to 68% of malaria cases averted  
53 between 2000 and 2015 (2). Alongside these preventative interventions, artemisinin combination  
54 therapies (ACT) have been the cornerstone of human malaria treatment since their widespread

55 introduction at the beginning of this century (3, 4) and have contributed substantially to the reduction  
56 in malaria mortality and morbidity observed since then (2).

57 Despite sizeable investment, malaria control and elimination efforts are, however, faltering due to  
58 reduced operational effectiveness of these key control tools, largely caused by mosquito resistance to  
59 insecticides and parasite resistance to drugs (5-8). In the malaria hyperendemic regions of southern  
60 Mali and southwest Burkina Faso, for example, resistance to pyrethroids is extreme (9), driven by  
61 multifactorial and synergistic resistance mechanisms including enhanced metabolic detoxification  
62 through upregulated cytochrome P450s (metabolic resistance), and reduced tarsal uptake through  
63 cuticular thickening (cuticular resistance) (10-13). Similarly, the emergence and spread of artemisinin  
64 resistance to sub-Saharan Africa — a region where as many as 93% of annual malaria deaths occur (1)  
65 — is a major concern. Until recently, resistance to these first line antimalarials was limited  
66 geographically to the Greater Mekong Subregion (GMS), however *de novo* mutations in *PfKelch13*  
67 associated with *in vitro* resistance have now been detected in Uganda, Tanzania, and Rwanda (8, 14-  
68 19). Of further concern is the recent invasion and spread of the Asian vector *Anopheles stephensi* to  
69 the horn of Africa (20), as this mosquito species is highly competent for the transmission of *P.*  
70 *falciparum* parasites endemic to the GMS and therefore, invasive populations may facilitate the spread  
71 of parasites harboring artemisinin resistance mutations from Asia to Africa. Besides insecticide  
72 resistance, an additional hurdle to malaria elimination is represented by residual malaria. Defined as  
73 malaria transmission in the presence of universal effective LLIN coverage, residual malaria is driven  
74 by mosquitoes that exhibit outdoor or daytime biting preferences and is a considerable hurdle to  
75 malaria eradication efforts (21). Increased focus on residual malaria has stimulated interest in the use  
76 of attractive toxic, or targeted (22), sugar baits (ATSBs) to attract and kill adult mosquitoes irrespective  
77 of blood-feeding behavior, which in field trials have shown some promise as a tool for suppressing  
78 vector populations (23, 24).

79 Thus, a control strategy that prevents insecticide resistant *Anopheles* populations from transmitting  
80 malaria parasites, including parasite strains carrying drug resistance mutations, regardless of mosquito  
81 feeding behavior and without imposing strong selective pressure on mosquitoes could overcome the  
82 limitations of current mosquito-targeted interventions. In an effort to generate such a strategy, we  
83 recently demonstrated that transmission of *P. falciparum* parasites can be prevented when *Anopheles*  
84 *gambiae* are exposed to the antimalarial atovaquone (ATQ) through direct contact — analogous to the  
85 mode of insecticide exposure on LLINs or IRS (25). Contact with ATQ-coated surfaces completely  
86 abrogated parasite development when it occurred around the time of infection (between 24 hours (h)  
87 before and 12 h post feeding on *P. falciparum*-infected blood), preventing onward transmission of the  
88 parasite. Importantly, mathematical models based on these results showed that integrating antimalarial  
89 ingredients into existing mosquito-targeted interventions could considerably reduce malaria  
90 transmission in areas of widespread insecticide resistance, empowering our best malaria prevention  
91 tools (25).

92 Here we show that targeting *P. falciparum* with antimalarials during its development in the *Anopheles*  
93 female circumvents the hurdles of insecticide and drug resistance, providing a critical addition to the  
94 malaria elimination toolkit. Parasite development is substantially reduced when wild, as well as  
95 recently lab adapted *Anopheles coluzzii* (a sibling species of *An. gambiae*) that are highly resistant to  
96 pyrethroids are exposed to ATQ prior to feeding on blood taken from *P. falciparum*-infected donors  
97 in Burkina Faso. ATQ is also fully active against field-derived *P. falciparum* parasites from Cambodia  
98 that are resistant to artemisinin. When using distinct drug targets in humans and mosquitoes, this  
99 method is therefore capable of both overcoming insecticide resistance mechanisms and stopping  
100 transmission of parasite mutations that confer resistance to frontline antimalarials. Finally, we show  
101 that delivering ATQ via sugar solutions causes a striking reduction in both parasite numbers and  
102 growth, proving that antimalarials could also be incorporated into interventions that target outdoor  
103 malaria transmission, such as ATSB. Targeting *Plasmodium* parasites in the mosquito vector is

104 therefore a promising strategy that circumvents key limitations of current malaria control and  
105 preventative interventions.

## 106 **Results**

### 107 **Exposure to ATQ substantially reduces infection with field *P. falciparum* isolates in insecticide** 108 **resistant *An. coluzzii***

109 To determine whether antimalarial exposure can maintain efficacy in insecticide-resistant mosquitoes,  
110 we took *An. coluzzii* collected as pupae from larval breeding sites in Bama, Burkina Faso and reared  
111 them to adults at the IRSS, Burkina Faso. Adult mosquitoes were infected using *P. falciparum*  
112 gametocyte positive blood obtained from a malaria infected human donor on the day of infection. The  
113 *An. coluzzii* mosquitoes endemic to this part of Burkina Faso – hereafter named AcVK5 – are highly  
114 resistant to pyrethroids (9, 11, 26). AcVK5 mosquitoes were exposed to ATQ for 6 minutes (min) at  
115 two concentrations (100  $\mu\text{mol}$ - or 1  $\text{mmol}/\text{m}^2$ ) or a mock-treated blank control surface prior to feeding  
116 on infectious blood samples. Infection outcomes were assayed at 7 days (d) post infectious blood meal  
117 (pIBM) by dissection of the mosquito midgut to determine the prevalence and intensity of parasite  
118 oocysts (Fig. 1 a). Control-exposed AcVK5 females were robustly infected with 81.3% harboring at  
119 least one *P. falciparum* oocyst, and median infection intensity in infected females of 19 oocysts per  
120 midgut. In contrast, AcVK5 mosquitoes exposed to either dose of ATQ had significantly reduced *P.*  
121 *falciparum* infection both in terms of prevalence and intensity (Fig 1b). At the highest concentration,  
122 we observed a 99% overall reduction in infection relative to the control (84.6% reduction in prevalence  
123 and 94.8% reduction in median intensity), while at the lower dose inhibition of infection reached 96%  
124 overall (65.9% reduction in prevalence and 89.5% reduction in median intensity). These results  
125 demonstrate that direct tarsal antimalarial exposure, for instance incorporating antimalarials in LLINs  
126 and IRS, can effectively block transmission of circulating west African *P. falciparum* parasites in  
127 highly insecticide resistant endemic *Anopheles* mosquitoes. Although our previous findings had shown

128 that both ATQ doses tested above are capable of complete inhibition of parasite transmission using the  
129 combination of standard *P. falciparum* (NF54) and insecticide-susceptible *Anopheles* (G3) populations  
130 (25), our results confirm that parasite development can be considerably impaired when exposing  
131 mosquitoes to antimalarials.

132 The observation of few parasites surviving exposure may indicate that parasite or mosquito factors in  
133 our Burkinabe populations could be reducing the efficacy of ATQ in this assay, potentially including  
134 interference from extant insecticide resistance mechanisms in AcVK5 mosquitoes, or reduced ATQ  
135 drug sensitivity in *P. falciparum* in this region. To test these possibilities, we initially assayed the  
136 efficacy of ATQ against insecticide resistant, Burkina Faso-derived *An. coluzzii* (hereafter Bama-R)  
137 with the lab standard *P. falciparum* strain NF54. Reared under pyrethroid selective pressure under  
138 otherwise standard laboratory conditions, Bama-R have maintained the parental trait of 100%  
139 resistance to permethrin at the WHO discriminating concentration (DC, 696  $\mu\text{mol}/\text{m}^2$ ) and exhibit  
140 appreciable acute survival at five times this dose (SFig. 1b). Bama-R mosquitoes are segregating for  
141 the *kdr* mutation in *para* conferring target site resistance (SFig. 1c), but constitutively overexpress  
142 CytochromeP450 genes associated with both metabolic resistance through enhanced small molecule  
143 detoxification (SFig. 1d(27)), and cuticular thickening (26) Bama-R females were exposed to the  
144 maximal effective concentration for tarsal ATQ (EC<sub>99</sub>, 100  $\mu\text{mol}/\text{m}^2$ , 6 min (25)) or to a vehicle control  
145 immediately preceding infection, and parasite prevalence and intensity were determined at 7 d pIBM.  
146 While control females were highly infected, with a median of 12 oocysts per infected midgut and  
147 81.25% overall prevalence of infection, no oocysts were observed in females exposed to ATQ,  
148 suggesting that insecticide-resistance mechanisms found in highly resistant, natural *Anopheles*  
149 populations do not interfere with the transmission blocking activity of ATQ (Fig. 1c).

150 Next, we established an *in vitro* *P. falciparum* culture from a polyclonal isolate (P5) collected from a  
151 gametocytomic donor from Burkina Faso (28)) and infected the laboratory standard, insecticide  
152 susceptible mosquito strain *An. gambiae* (G3). P5 development was 100% suppressed in females

153 treated with the EC<sub>99</sub> of ATQ (Fig. 1d) such that zero oocysts were observed in midguts, compared to  
154 heavy infections—both in terms of infection intensity (median 59.5 oocysts per midgut) and infection  
155 prevalence (95.7%)—in controls. Delivery of ATQ to mosquitoes is therefore fully effective against  
156 field-derived *P. falciparum* isolates currently circulating in West Africa.

### 157 **ATQ prevents the transmission of an artemisinin-resistant *P. falciparum* isolate from the GMS**

158 Given the results obtained with field-derived parasites from Africa, we next tested the ability of ATQ  
159 to kill artemisinin resistant parasites from the GMS, where mutations conferring artemisinin resistance  
160 occur in a high proportion of *P. falciparum* isolates, constituting a major public health threat. We  
161 reasoned that these experiments would also allow us to test the concept of directly targeting drug  
162 resistant *P. falciparum* during mosquito development, removing resistance mutations from the parasite  
163 population, and thereby “rescuing” ACT efficacy in human treatment. To this end, we used a  
164 Cambodian *P. falciparum* patient clone (KH001\_029 (5), hereafter ART29) carrying the C580Y  
165 mutation in *PfK13* conferring resistance to artemisinin (Fig. 2a). We used the major Asian malaria  
166 vector *An. stephensi* for these experiments as initial tests with *An. gambiae* did not produce appreciable  
167 infections (SFig. 2). ART29 generated robust infections in control, mock-exposed *An. stephensi*,  
168 (median 16 oocysts per midgut, 100% prevalence of infection). Conversely, no oocysts were detected  
169 in females exposed to ATQ prior to infection (100  $\mu\text{mol}/\text{m}^2$ , 6 min) (Fig. 2b). These data show that  
170 mosquito exposure to antimalarials, such as by incorporation in bed nets, indoor residual sprays (or  
171 other contact methods such as eaves tubes (29), could be an effective strategy for reducing the spread  
172 of artemisinin resistance both within and between malaria endemic areas, including sub-Saharan  
173 Africa.

### 174 **ATQ exposure during an ongoing infection delays oocyst growth and decreases sporozoite** 175 **prevalence**



176 In the field, mosquitoes that contact an antimalarial compound through mosquito-targeted  
177 interventions may harbor parasites from a previous blood meal that have already traversed the midgut  
178 lumen and formed oocysts. We therefore investigated the effects of ATQ on parasites in which oocyst  
179 development is already underway, exposing G3 mosquitoes 6d pIBM (NF54, Fig. 3a). In contrast to  
180 females exposed before infection, ATQ had no effect on the prevalence or intensity of infection, as  
181 measured at 10d pIBM, suggesting ATQ acts differently on oocysts compared to zygote and ookinetes  
182 (Fig. 3b). However, when we measured the size of the developing oocysts, we observed a significant,  
183 45% decrease in the mean oocyst cross-sectional area (Fig. 3c). Oocyst size is a good proxy for rate of  
184 growth (30) and as such, when we sampled mosquitoes at a later time point when sporozoite invasion  
185 of salivary glands has already occurred (14 d pIBM), we observed a 33% reduction in the prevalence  
186 of sporozoites in the salivary glands of ATQ-treated females (Fig. 3d). Similar results were obtained  
187 when ATQ exposure instead occurred at 3 d pIBM (SFig. 3). Taken together, these results suggest that  
188 ATQ exposure after oocyst formation has a partial cytostatic effect on *P. falciparum*.

### 189 **Ingestion of an ATQ-glucose solution blocks the establishment of *P. falciparum* infection**

190 To determine whether anti-parasitic compounds in sugar could suppress *Plasmodium* development in  
191 the mosquito, we began by testing the efficacy of mosquito ATQ-glucose ingestion against the  
192 transmission of *P. falciparum* parasites isolated from gametocytemic donor blood samples collected  
193 from gametocyte carriers in Nasso, near Bobo Dioulasso, Burkina Faso. Adult female *An. gambiae*,  
194 collected as pupae from larval breeding sites, were denied sugar for 24 h, then given access to an ATQ-  
195 treated sugar solution (100  $\mu$ M ATQ/0.5% v/v DMSO/10% w/v glucose) *ad libitum* for the 24 h  
196 preceding infection (Fig. 4a). We observed a striking, 85% reduction in the prevalence of wild *P.*  
197 *falciparum* infection in female mosquitoes that had access to ATQ-glucose prior to infection (Fig. 4b).  
198 Importantly, median mosquito survival between control and ATQ treatment groups was not  
199 significantly different (SFig. 4), confirming previous findings that atovaquone is not toxic to

200 mosquitoes at parasitocidal concentrations (25). This implies that other *Plasmodium*-specific inhibitors  
201 would therefore not impose selective pressures leading to resistance mechanisms in the mosquito.  
202 Using the same conditions with *in vitro* cultured *P. falciparum* (NF54) and lab-adapted *An. gambiae*  
203 (G3) resulted in a remarkably similar infection outcome, with a 92.5% reduction in oocyst prevalence  
204 in female *An. gambiae* given access to ATQ-glucose solution relative to controls (Fig. 4c). When ATQ  
205 concentration was reduced to 10- and 100-fold ATQ dilutions, we observed progressively reduced,  
206 dose dependent effects on prevalence (Fig. 4d).

### 207 **ATQ ingestion during an ongoing *P. falciparum* infection impairs sporogony**

208 As mosquitoes may often visit a sugar bait after acquiring an infectious blood meal, we also  
209 investigated the impact of ATQ ingestion on ongoing *P. falciparum* (NF54) infections, providing  
210 ATQ-treated sugar to G3 females from 2 d pIBM, when ookinetes have escaped the midgut lumen and  
211 formed oocysts on the midgut basal lamina (Fig. 5a). This time, as based on our previous results (Fig.  
212 3) we expected a possible cytostatic effect on oocyst growth, we performed a sampling time course to  
213 capture oocyst development through mid- to late sporogony (7d, 10d and 14 d pIBM). We also counted  
214 salivary gland sporozoites, the end point of parasite development in the mosquito, at 14 d pIBM. In  
215 agreement with our previous results, we observed no change in oocyst prevalence and intensity because  
216 of ATQ ingestion (SFig. 5). However, we observed an 80.8% decrease in oocyst cross-sectional area  
217 relative to controls at 7 d pIBM, which persisted at later time points (89% and 76.3% decreases at 10-  
218 and 14 d pIBM, respectively) (Fig. 5b). By 14 d pIBM, ATQ-exposed oocysts had a similar size to 7  
219 d pIBM control oocysts, suggesting a remarkable suppression of growth. Inspection of DAPI-stained  
220 infected midguts revealed a stark decrease in the number of nuclear foci, with a single, diffuse DNA  
221 signal compared to many condensed foci in oocysts in controls (Fig. 5c). Strikingly, we detected no  
222 sporozoites in the salivary glands of mosquitoes given access to ATQ-glucose 14 d pIBM, despite robust  
223 infection in controls (Fig. 5d). Combined, these data point to a strong suppression of oocyst growth,

224 DNA replication and sporozoite differentiation after ATQ ingestion, suggesting that besides  
225 preventing new mosquito infection, this delivery method would be extremely effective at curbing  
226 ongoing infections and transmission.

## 227 **Discussion**

228 In this study we demonstrate the strong potential of incorporating antimalarials into LLINs, IRS and  
229 ATSBs to stop transmission of endemic parasites by insecticide-resistant *Anopheles*. Our proof of  
230 principle compound ATQ was very effective at killing a polyclonal, field-derived parasite isolate from  
231 sub-Saharan Africa, showing that an antimalarial-based LLIN or IRS could suppress transmission even  
232 in areas of malaria hyperendemicity, where vector pyrethroid resistance is exceptionally high, and  
233 multiple parasite haplotypes coexists (31, 32).

234 Tarsal ATQ exposure against wild *An. coluzzii* (AcVK5) collected as pupae from breeding sites was  
235 able to strongly suppress the transmission of *P. falciparum* isolates circulating in children.  
236 Interestingly, in these infections, carried out in Burkina Faso, we observed a small number of  
237 “breakthrough” oocysts at ATQ doses that are non-permissive in tests using, respectively, lab-adapted  
238 and susceptible NF54 parasites and G3 mosquitoes (25). We reasoned that this marginal reduction in  
239 efficacy could be due to extant insecticide resistance circulating in wild *Anopheles gambiae* s.l.  
240 populations in Burkina Faso, including the wild AcVK5 mosquitoes used for these experiments. While  
241 clearly target-site resistance mechanisms are unlikely to impact the activity of antimalarials like ATQ,  
242 both cuticular and metabolic resistance could potentially interfere with function by limiting compound  
243 uptake and stability, respectively. The CYP450 monooxygenases associated with pyrethroid metabolic  
244 detoxification in *An. gambiae* s.l. have been shown to confer some degree of resistance to a structurally  
245 and functionally diverse array of compounds including the insecticide DDT, the juvenile hormone  
246 agonist pyriproxyfen (33), and several arthropod mitochondrial complex I inhibitors including the  
247 otherwise promising insecticide fenpyroximate (34). Similarly, cuticular resistance, where the waxy

248 exocuticle of the mosquito has thickened as an adaptation to insecticide pressure (11), could slow or  
249 eliminate uptake of other small molecules. However, tarsal ATQ (at the EC<sub>99</sub>, 100 µmol/m<sup>2</sup> for 6 min)  
250 completely abrogated parasite infection in Bama-R mosquitoes, which are derived from the parental  
251 AcVK5 population and exhibit a similar, high level of insecticide resistance combining the additive  
252 effects of metabolic and cuticular resistance components (SFig. 1, (26)). This observation suggests that  
253 mosquito pyrethroid resistance status, or other vector factors, did not affect tarsal antimalarial efficacy  
254 in our experiments.

255 Similarly, in the reciprocal experiment, transmission of the culture-adapted Burkinabe *P. falciparum*  
256 isolate P5 was blocked in an insecticide susceptible *An. gambiae* lab strain (G3), again indicating that  
257 parasite factors are likely not responsible for the observed reduction in efficacy. Clinically-induced  
258 resistance to ATQ in *P. falciparum* is associated with mutation at position 268 of the mitochondrial  
259 gene *cytochrome B* (35), while *in vitro* selection typically results in mutation elsewhere in the gene  
260 (36-38). ATQ is not in clinical use in sub-Saharan Africa, so it is unlikely that ATQ resistance-  
261 conferring mutations are circulating in Burkina Faso at any appreciable frequency. However, while  
262 certain ATQ-resistance mutations induce a transmission defect in both *P. berghei* and *P. falciparum* -  
263 resulting in failure to establish infection in mosquitoes (37) there are contradictory findings in the  
264 literature (38), and it has been shown that naturally occurring ATQ resistance-conferring mutations  
265 can persist at ultra-low frequency in parasite populations through mitochondrial heteroplasmy (39).  
266 Thus while the Burkinabe isolate (P5) used in our lab-based studies was susceptible to ATQ *in vitro*,  
267 and Sanger sequencing of *Cytochrome B* from both P5 asexual blood stages and oocysts showed that  
268 these parasites are wild-type, we cannot rule out the possibility that either cryptic parasite factors, lost  
269 during the short P5 laboratory adaptation period, or specific vector-parasite interactions in wild  
270 populations are responsible for the observed reduction in ATQ efficacy in our Burkina-based  
271 experiments. The observed decrease in *P. falciparum* numbers remains extremely significant (above  
272 96% total inhibition at 100 µmol/m<sup>2</sup>). Taken together, these data demonstrate that mosquito-targeted

273 antimalarial exposure can bypass currently circulating insecticide resistance mechanisms, maintaining  
274 activity even in areas where conventional insecticides have ceased to be effective — an essential trait  
275 of any new mosquito-targeted tool.

276 ATQ exposure also killed artemisinin-resistant *P. falciparum* parasite ART29 in *An. stephensi*. *De*  
277 *novo PfK13* mutations associated with *in vitro* resistance, already highly prevalent in Cambodia and  
278 other part of the GMS, have now been detected in Uganda, Tanzania and Rwanda (14-19) and the  
279 recent invasion and spread of *An. stephensi* to the horn of Africa (20) may facilitate the spread of these  
280 parasites. Widespread artemisinin resistance in Africa, a region where malaria prevention is already  
281 challenging due to insecticide resistance, would be a major public health concern. Although our results  
282 were somewhat expected given ART29 parasites are ATQ-sensitive *in vitro* during asexual  
283 development (40), they are an important proof of concept, both that drug-based mosquito-targeted  
284 interventions could be developed to specifically contain and eliminate parasite haplotypes conferring  
285 resistance to human antimalarial therapeutics, and that tarsal uptake of antimalarials function similarly  
286 in *An. stephensi*. Antimalarial pressure directed at different drug targets in the human and mosquito  
287 life stages could effectively suppress the spread of resistance mutations selected in either host and to  
288 either target, allowing the possibility for close integration of human- and mosquito-targeted  
289 antimalarial interventions in the future. Importantly, mosquito-targeted antimalarials attack the  
290 parasite during an extreme population bottleneck and in a non-cyclical stage in its life cycle (41-43),  
291 reducing the probability of selection of both extant and *de novo* resistance mutations during mosquito-  
292 stage drug challenge compared to treatment during the human asexual cycle. Nevertheless, even the  
293 possibility for selection of resistance during parasite sporogonic development means, as a fundamental  
294 principle, any mosquito-targeted antimalarial compound integrated into LLIN or IRS must not share a  
295 mode of action with current human antimalarial therapeutics. Thus, despite its efficacy in our studies,  
296 ATQ could not be responsibly incorporated into a mosquito-targeted intervention due to its use as a

297 human prophylactic and therapeutic drug (44), making identification of additional active compounds  
298 in diverse mode of action classes a priority.

299 Ingestion of sugar solutions containing ATQ before *P. falciparum* infection blocked transmission in  
300 both field-derived and *in vitro* cultured *P. falciparum*. Such close agreement between these  
301 experiments, carried out at different sites with different parasites and mosquitoes, is a testament to the  
302 promise of this strategy, demonstrating its high effectiveness in spite of the inherent variability of  
303 mosquito sugar feeding behavior (45). Furthermore, continued mosquito access to ATQ-sugar post  
304 infection reduced oocyst growth resulting in absence of salivary gland sporozoites. These results  
305 support the use of antimalarials in ATSB-like strategies to reduce residual malaria transmission carried  
306 out by mosquitoes that predominantly rest and feed outside and thereby avoid both LLINs and IRS.  
307 While current proposed ATSB designs rely on insecticidal ingredients (23, 24, 46), the use of  
308 antimalarials in sugar baits could act as a more specific and environmentally benign paradigm for this  
309 promising intervention should suitable antimalarial ingredients be identified (47-49). ATQ uptake via  
310 tarsal contact at 3- or 6-days post infection also significantly reduced oocyst growth, resulting in an  
311 appreciable reduction in the proportion of salivary gland sporozoite-positive mosquitoes. *P.*  
312 *falciparum* is therefore also vulnerable to inhibition through tarsal exposure during the oocyst stage,  
313 which is by far the longest developmental stage in the mosquito, taking between 7-10 days depending  
314 on the frequency of blood feeding (30), and thus is the parasite life stage most likely to encounter a  
315 mosquito-targeted intervention. As such, the ability to stall or kill oocysts and sporozoites is a highly  
316 desirable quality for mosquito-targeted antimalarials.

317 ATQ targets the ubiquinol oxidation (Qo) site of cytochrome b (50), a key element of the  
318 mitochondrial electron transport chain (mtETC) which has dual roles in both ATP generation through  
319 oxidative phosphorylation and DNA replication through ubiquinone-mediated redox of dihydroorotate  
320 dehydrogenase (51). Thus, inhibition of either DNA replication or ATP production, or both, could  
321 explain the cytostatic effect observed here. Consistent with our findings, previous studies have shown

322 that disruption of ATP production through knock-out of components of the tricarboxylic acid cycle in  
323 *P. falciparum* (52) and mtETC in *P. berghei* (53-55) can cause oocyst arrest. Moreover, chemical  
324 inhibition of *P. vivax* DNA replication during sporogony was also sporontocidal (56), suggesting  
325 mitochondrial inhibitors could also be utilized to prevent transmission of these widespread human  
326 malaria parasites. Identifying the specific mechanism by which ATQ and other mtETC inhibitors affect  
327 sporogonic development in *Plasmodium* is an interesting area for further study.

328 Although at an early stage, mosquito-targeted antimalarials have the potential to be an effective  
329 element to drive malaria incidence down. To this end, identifying more compounds with strong  
330 antiparasitic activity during the mosquito stages of *P. falciparum* development – and in particular  
331 compounds with sporogony-specific activity – will be a crucial next step, and one that should leverage  
332 the extensive libraries of known antimalarials. Indeed, one of the key strengths of this approach is the  
333 potential to exploit and repurpose compounds that are otherwise unsuitable for human therapeutic use,  
334 whether due to toxicity, poor bioavailability, poor kinetics, or other limiting factors. By integrating  
335 human and mosquito-based interventions, this strategy will extend and protect the efficacy of human  
336 therapeutics and vector control strategies, giving malaria control efforts renewed vigor.

337 **Materials and Methods**

338 *Mosquito lines, insecticide resistance selection and husbandry*

339 *Anopheles* spp. mosquito populations used in this study were: 1) wild *An. coluzzii* captured as pupae  
340 from breeding sites, described below. 2) Laboratory-reared *An. gambiae* obtained from an outbred  
341 colony established in 2019 and repeatedly replenished with F1 from wild-caught females collected in  
342 Soumouso (11°23'14"N, 4°24'42"W).3) *An. gambiae* G3 (“G3”), a highly lab-adapted, insecticide-  
343 susceptible strain competent for *P. falciparum* of African origin. 4) *An. stephensi* (Anst-S), a similarly  
344 lab-adapted, insecticide-susceptible strain competent for *P. falciparum* of both African and Asian  
345 origin received as a gift from The Institute of Molecular Medicine, University of Lisbon, Portugal. 5)  
346 *An. coluzzii*. Bama-R (“Bama-R”) a colony established through hybridization of the F1 progeny of  
347 female *An. coluzzii* collected from Vallee du Kou, Burkina Faso, with our G3 colony. Since  
348 establishment, Bama-R has been kept under frequent permethrin selection pressure and exhibits a  
349 consistent pyrethroid resistance phenotype. At the time of this study, (F17-20) Bama-R females were  
350 highly resistant to pyrethroids, exhibiting 97% survival in standard WHO insecticide resistance assays  
351 — briefly, 1 h exposure to the WHO discriminating concentration (DC, 275 mg/m<sup>2</sup>) of permethrin-  
352 impregnated papers with mortality scored at 24 h post-exposure — and 43% survival at 5x the DC.  
353 Except for selection of resistance in Bama-R, all mosquito colonies were maintained identically at 26  
354 °C ± 2 °C and 80% ± 10% relative humidity (RH). Larvae were cultured in 2-liter (l) catering pans in  
355 500 ml distilled water (dH<sub>2</sub>O) under an optimized density and feeding regimen. At the onset of  
356 pupation, pupae were separated from larvae using a vacuum aspirator, collected in dH<sub>2</sub>O, and placed  
357 in a 30x30x30 cm cage (Bugdorm, Megaview Science Co, Ltd, Thailand). After emergence, adult  
358 mosquitoes had access to separate sources of 10% glucose (Sigma Aldrich, US) and dH<sub>2</sub>O *ad libitum*.  
359 For colony maintenance, 5–7-day-old adults were provided a blood meal of donated human blood  
360 using an artificial membrane feeding system (Hemotek, UK). For mosquito colony 2) females were  
361 maintained on rabbit blood by direct feeding (protocol approved by the national committee of Burkina



362 Faso; IRB registration #00004738 and FWA 00007038) and adult males and females fed with a 5%  
363 glucose solution. Larvae were reared at a density of about 300 first-instar larvae in 700 ml of water in  
364 plastic trays and fed with Tetramin Baby Fish Food (Tetrawerke, Melle, Germany).

#### 365 *P. falciparum* strains and culture

366 *P. falciparum* strains used in this study were: 1) *P. falciparum* NF54. NF54 is the drug-susceptible  
367 standard strain for mosquito transmission studies, obtained from BEI Resources in 2014. This parasite  
368 culture was received through a material transfer agreement (MTA) with the laboratory of Dr. Carolina  
369 Barillas-Mury. 2) *P. falciparum* P5. P5 is polyclonal (n=3, KMMM, KMKM, RMMM), as determined  
370 by MSP1 PCR genotyping following standard procedures (28), and has been culture-adapted from a  
371 blood sample contributed by a gametocytemic malaria donor in Burkina Faso in 2017. 3) *P. falciparum*  
372 KH001\_029 “ART29”. ART29 is a *P. falciparum* monogenomic parasite isolate obtained from an  
373 infected human patient in Pursat, Cambodia (KH1 clade) between 2011 and 2013 as part of the TRAC  
374 I initiative (5). This parasite carries the *PfK13* mutation C580Y associated with resistance to  
375 artemisinin. ART29 has clear phenotypic artemisinin resistance, both as determined by *in vivo*  
376 clearance time (11.8 h) and *in vitro* ring-stage survival (22.6%) (57), alongside resistance to other  
377 antimalarial drugs, including mefloquine and chloroquine, but is not resistant to piperazine or ATQ  
378 (40). These parasites generate robust infections in *An. stephensi* mosquitoes, but not *An. gambiae*  
379 (SFig. 2).

380 For mosquito infection with gametocytemic donor blood samples, *P. falciparum* samples were  
381 collected and prepared for infection as described previously (58). Briefly, *P. falciparum* gametocyte-  
382 positive whole blood samples were collected from 5–13-year-old donors from the villages surrounding  
383 Bobo Dioulasso, Burkina Faso as part of a separate study. Red blood cells were isolated by  
384 centrifugation of a 4 ml aliquot of donor blood followed by resuspension in *Plasmodium* naïve human  
385 AB serum. Blood samples were then provided to mosquitoes using a custom blown, water heated glass  
386 feeder. For mosquito infection with *in vitro* cultured parasites, females were transferred to a secure

387 malaria infection facility and provided a 14-21 d post-induction stage V *P. falciparum* gametocyte  
388 culture using a custom blown, water heated glass feeder. For all infection experiments, within 24 h of  
389 infection, partially engorged or unfed mosquitoes were collected by vacuum aspiration and discarded.  
390 To determine oocyst burden, between 7 and 14 d pIBM, infected mosquitoes were collected by vacuum  
391 aspiration, and dissected to isolate the midgut. The oocyst burden was determined after staining  
392 midguts with 0.2% w/v mercurochrome and examination under a 40x air objective inverted compound  
393 light microscope (Olympus, US). For sporozoites, at 14 d pIBM infected mosquitoes were collected  
394 by vacuum aspiration and beheaded. The mosquito salivary glands were extracted into RPMI media  
395 by applying pressure to the lateral thorax. *P. falciparum* sporozoites were isolated by homogenization  
396 and centrifugation of salivary gland material, followed by resuspension in a known volume of RPMI.  
397 Sporozoites were counted using a disposable haemocytometer under a 20x air objective inverted  
398 compound light microscope (Olympus, US). All *P. falciparum* strains were cultured and induced to  
399 form gametocytes using standard protocols (59, 60). All strains have been confirmed to be *P.*  
400 *falciparum* by PCR followed by DNA sequencing of the amplified products (61) and have been  
401 confirmed free of mycoplasma infection.

#### 402 *Pre- and post-infection tarsal contact infection assays*

403 Tarsal exposure plates were prepared as described previously (25). Briefly, for 100  $\mu\text{mol}/\text{m}^2$  plate  
404 concentrations, 0.1 ml of this solution of a 0.1% w/v solution of ATQ in acetone was diluted with 1  
405 ml additional acetone and spread onto a 6 cm diameter (0.002628  $\text{m}^2$ ) glass petri dish. For 1  $\text{mmol}/\text{m}^2$ ,  
406 1 ml of 0.1% w/v ATQ/acetone solution was added directly to the plate. Plates dried for a minimum  
407 of 4 h, with agitation on a lateral shaker at room temperature. For pre-infection exposure, 30 min prior  
408 to infection, 3-5 d old virgin female mosquitoes were incubated on either ATQ-coated plates, or an  
409 acetone treated control, for 6 min. To prevent crowding and agitation, a maximum of 25 mosquitoes  
410 were exposed per plate, with all exposures occurring in parallel. For post-infection exposure, due to

411 biosafety considerations, compound exposures were carried out in serial, with a maximum of 10  
412 infected mosquitoes per plate.

#### 413 *Pre- and post-infection sugar feeding infection assays*

414 For experiments involving compound-treated sugar solutions, 20 mM stock solutions of each active  
415 ingredient (AI) were prepared in 100% DMSO. Each 20 mM stock solution was diluted 200-fold in  
416 10% w/v glucose to achieve the final working concentration of 100  $\mu$ M AI/0.5% DMSO/10% w/v  
417 glucose. For pre-infection sugar feeding experiments, 2-4 d post-emergence females were denied  
418 access to glucose or water for 24 h and then provided access to either the test solution, or a control  
419 solution of 0.5% v/v DMSO/10% glucose, for 24 h. After this time had elapsed, all mosquitoes were  
420 provided with an infectious *P. falciparum* blood meal as described above. Infected mosquitoes were  
421 provided with untreated 10% w/v glucose *ad libitum* for the remainder of the experiment. For post-  
422 infection sugar-feeding experiments, 3-5 d post-emergence female mosquitoes were infected with *P.*  
423 *falciparum* and denied access to glucose or water for 48 h pIBM. After this time, infected mosquitoes  
424 were continuously provided either 100  $\mu$ M ATQ/0.5% DMSO/10% w/v glucose or 0.5% DMSO/10%  
425 w/v glucose as control, *ad libitum*. Sugar feeders were replaced every 48 h for the remainder of the  
426 experiment, up to 14 d pIBM.

#### 427 *Statistical analyses*

428 Statistical analyses were carried out using GraphPad Prism v8.4.2 for MacOSX (GraphPad Software  
429 Inc., USA) and JMP Pro 15 (SAS Corp. US).

#### 430 *Data generated from donor isolated gametocytes*

431 For infections with donor isolated gametocytes (Fig. 1(b), Fig. 4(b)), prevalence and intensity of  
432 infection were analyzed using more complex statistics to account for between-replicate effects of  
433 different human gametocyte donors. **For prevalence:** we constructed a General Linear Model as  
434 follows, independent variable/y “Infected?” (Two-level, categorical (yes/no)), with cofactors

435 “Treatment” (Two-level, categorical (Control/ATQ)) and “Gametocyte Donor” (Two-level,  
436 categorical (Donor 1/Donor 2)), we also included the interaction term Treatment\*Gametocyte Donor  
437 to detect higher level effects. As the output was categorical, the GLM model was run with a binomial  
438 distribution and logit link-function. To achieve the best model fit, we iteratively removed cofactors  
439 from the model, and selected the model output with the lowest corrected Akaike information criterion  
440 (AICc). In all cases, the best model fit included both cofactors, but excluded the interaction term. **For**  
441 **intensity:** Independent variable “Oocyst Count” (Continuous, positive integer) with cofactors  
442 “Treatment” (Two-level, categorical (Control/ATQ)) and “Gametocyte Donor” (Two-level,  
443 categorical (Donor 1/Donor 2)), and the interaction term Treatment\*Gametocyte Donor. To account  
444 for the overdispersion typical of parasite count data, we again took an iterative approach to model  
445 construction. Data were analyzed using both a GLM using a Poisson distribution, (link function: log;  
446 overdispersion parameter estimated by Pearson Chi-square/DF) and Generalized Regression with a  
447 Negative Binomial distribution. Relative model quality was determined by comparison of AICc for  
448 each distribution function (For GLM, with and without the overdispersion correction) and by iterative  
449 removal of cofactors. The highest quality model fit was an overdispersion-corrected Poisson/Log GLM  
450 with both cofactors but without the interaction term.

#### 451 *Data generated from in vitro experiments*

452 For all other infections, differences in prevalence were analyzed by Chi<sup>2</sup>. In experiments where both  
453 treatment groups had individuals that produced >0 oocysts, differences in median oocyst burden  
454 between groups (intensity of infection) was analyzed using a Mann-Whitney Mean Ranks test. For  
455 multiple comparisons, differences in prevalence between multiple groups were determined using  
456 pairwise Chi<sup>2</sup> corrected for multiple comparisons (Bonferroni). Similarly, multiple comparisons of  
457 intensity were carried out using a Kruskal-Wallis test with Dunn’s *post hoc*.

#### 458 **Author Contributions:**

459 DGP and FC wrote the manuscript. DGP, TL and FC designed the experiments. DGP and TL carried  
460 out statistical analysis. DGP, ASP, EM, DFSH, PP, RSY, TL and NS carried out infection experiments.  
461 DFSH, RSY, TL, WRS, SKV, and SB collected, established, maintained, and assayed parasite lines.  
462 KLA established and reared insecticide-resistant mosquito lines and carried out resistance assays. TL,  
463 AD, RKD, DFW, and FC, provided funding and oversight. All authors read and approved the  
464 manuscript prior to submission.

465

466 The authors state that they have no conflicting interests.

Figure 1

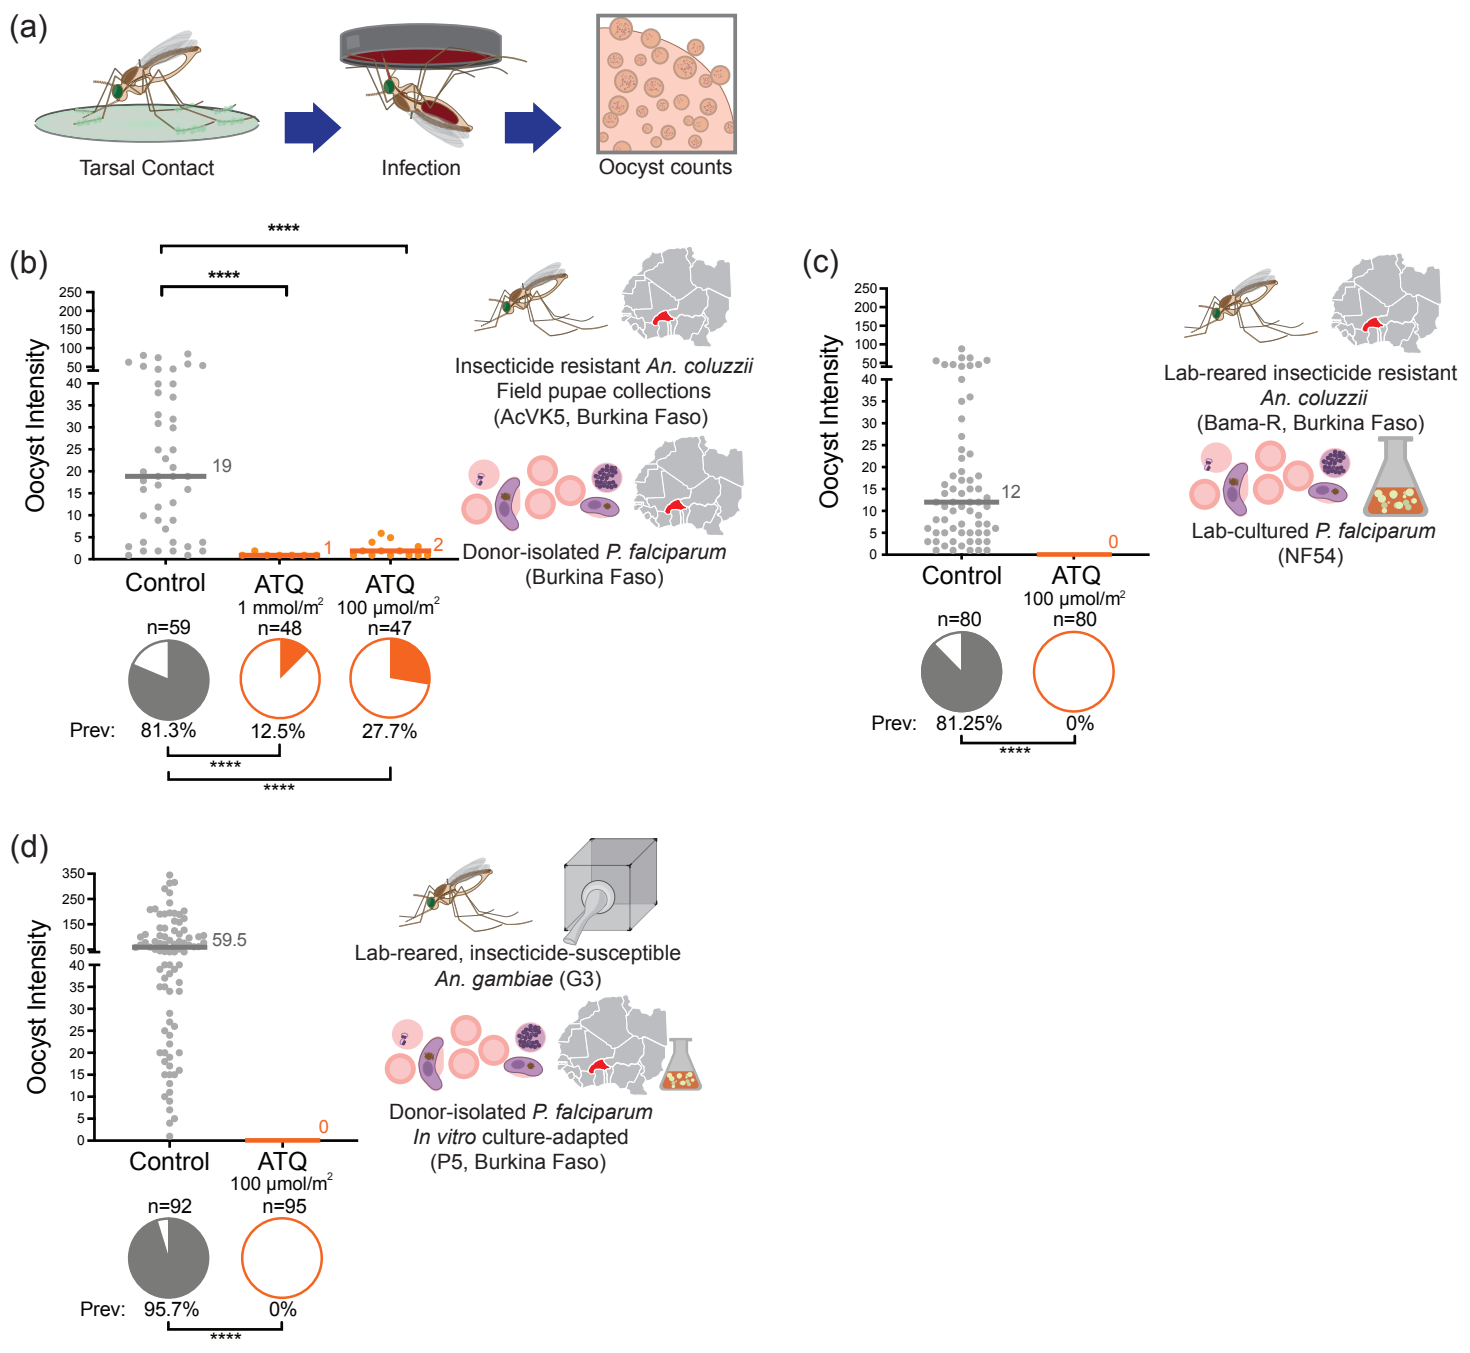

467 **Figure 1: Exposing *An. gambiae* mosquitoes to ATQ suppresses *P. falciparum* development in**  
468 **field-derived parasites and insecticide-resistant mosquitoes. (a)** Experimental scheme. **(b)** Female  
469 AcVK5 mosquitoes, collected as pupae from breeding sites in southwestern Burkina Faso, were  
470 exposed to ATQ by tarsal contact at either the maximal effective concentration (EC<sub>99</sub>) for insecticide-  
471 susceptible mosquitoes (100 µmol/m<sup>2</sup>, EC<sub>99</sub>) or 10x EC<sub>99</sub> (1 mmol/m<sup>2</sup>) for 6 minutes, prior to infection  
472 with donor-isolated “wild” *P. falciparum* (Burkina Faso), collected the same day. ATQ treatment  
473 resulted in a significant reduction in both infection prevalence (GLM (Binomial;Logit): 100 µmol/m<sup>2</sup>,  
474 n=106, df=1,  $\chi^2=31.997$ , p<0.0001; 1 mmol/m<sup>2</sup>, n=107, df=1,  $\chi^2=50.240$ , p<0.0001) and intensity  
475 (GLM (Poisson;Log): 100 µmol/m<sup>2</sup>: n=53, df=1,  $\chi^2=24.687$ , p<0.0001, 1 mmol/m<sup>2</sup>: n=59, df=1,  
476  $\chi^2=31.997$ , p<0.0001) at both doses, as measured by determination of *P. falciparum* oocyst burden at  
477 7 d pIBM. **(c)** In contrast, transmission of *in vitro*-cultured *P. falciparum* (NF54) is completely blocked  
478 when field-derived, lab-adapted insecticide-resistant *An. gambiae* (Bama-R) are exposed to ATQ for  
479 6 min to the maximal effective concentration (EC<sub>99</sub>) for insecticide-susceptible mosquitoes (100  
480 µmol/m<sup>2</sup>) prior to infection. In ATQ-exposed mosquitoes, prevalence was zero, in contrast to the robust  
481 infection in mock-exposed controls ( $\chi^2$ , n=160, df=1,  $\chi^2=93.545$ , p<0.0001). **(d)** Similarly,  
482 transmission of a polyclonal *P. falciparum* West African donor isolate (P5 – *in vitro* culture adapted)  
483 was blocked (zero evidence of infection at 7 d pIBM) after ATQ exposure prior an infectious blood  
484 meal, despite a strong (prevalence 95.7%, median intensity 59.5 oocysts per midgut) infection in  
485 controls ( $\chi^2$ , n=187, df=1,  $\chi^2=167.995$ , p<0.0001). Median lines and values are indicated, “n”  
486 indicates the number of independent samples. To isolate Oocyst Prevalence and Oocyst Intensity,  
487 midgut samples with zero oocysts have been excluded from intensity analysis. Statistical significance  
488 is indicated where relevant as follows: ns=not significant, \* = p<0.05, \*\*=p<0.01, \*\*\*=p<0.001,  
489 \*\*\*\*=p<0.0001.

Figure 2

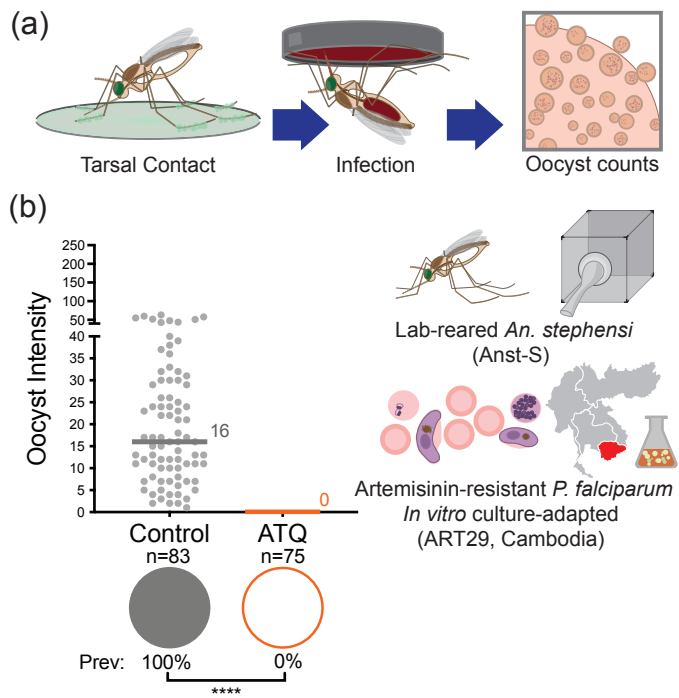



490 **Figure 2: Exposing *An. stephensi* to ATQ blocks an artemisinin-resistant *P. falciparum* patient**  
491 **isolate from Cambodia. (a)** Experimental scheme. **(b)** Transmission of artemisinin resistant *P.*  
492 *falciparum* (ART29) is completely blocked when *An. stephensi* females (Anst-S) are exposed to ATQ  
493 for 6 min to the maximal effective concentration (EC<sub>99</sub>) for insecticide-susceptible mosquitoes. In  
494 ATQ exposed mosquitoes, prevalence (indicated by pie charts) was zero despite robust infection in  
495 mock-exposed controls (Chi<sup>2</sup>, n=158, df=1, X<sup>2</sup>=156, p<0.0001). Median lines and values are indicated,  
496 “n” indicates the number of independent samples. To isolate Oocyst Prevalence and Oocyst Intensity,  
497 midgut samples with zero oocysts have been excluded from intensity analysis. Statistical significance  
498 is indicated where relevant as follows: ns=not significant, \* = p<0.05, \*\*=p<0.01, \*\*\*=p<0.001,  
499 \*\*\*\*=p<0.0001.

Figure 3

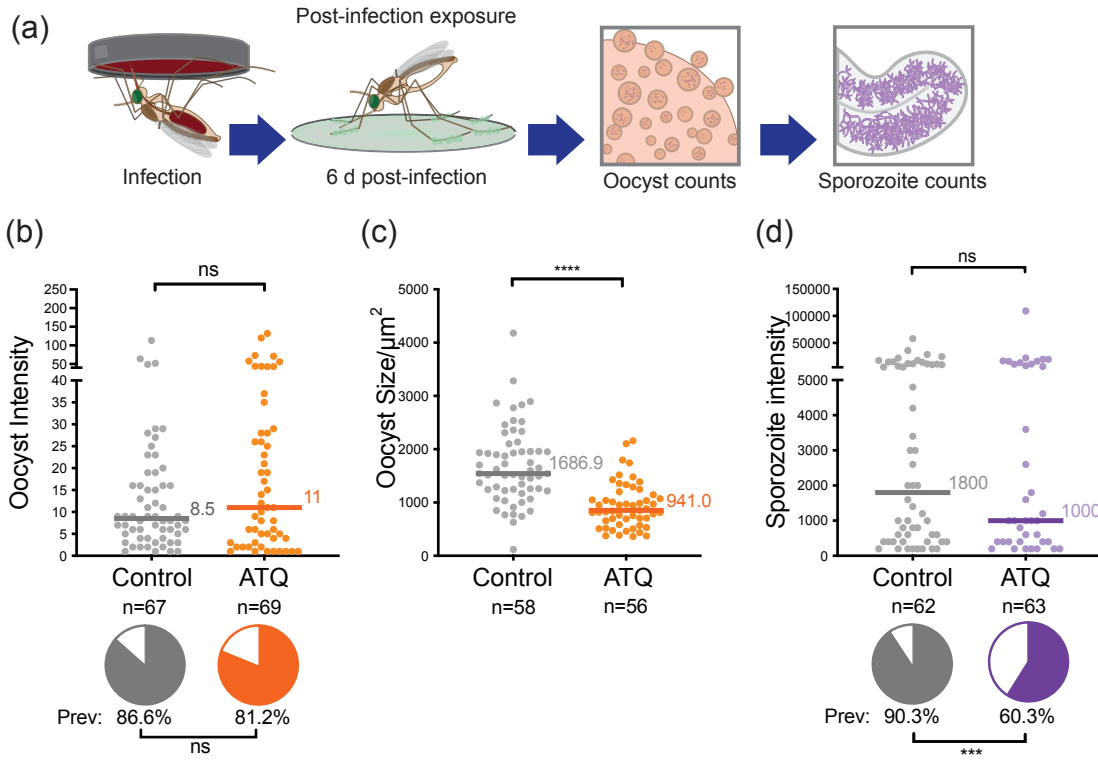

500 **Figure 3: Sporozoite prevalence is significantly reduced after tarsal ATQ exposure during oocyst**  
501 **development when *An. gambiae* (G3) are infected with *P. falciparum* (NF54).** (a) Experimental  
502 scheme. (b) There was no effect of 6 d pIBM ATQ exposure on either prevalence (indicated by pie  
503 charts) or intensity (indicated by points) of infection determined at 10 d pIBM. Prevalence:  $\chi^2$ ,  
504  $n=136$ ,  $df=1$ ,  $X^2=0.733$ ,  $p=0.3919$ , intensity: Mann-Whitney,  $n=114$ ,  $df=1$ ,  $U=1482$ ,  $p=0.4335$ . (c)  
505 ATQ exposure at 6 d pIBM significantly reduced the median cross-sectional area of oocysts relative  
506 to control ( $n=114$ ,  $df=1$ ,  $U=531$ ,  $p<0.0001$ ). (d) The prevalence, but not the median intensity of  
507 sporozoites in salivary glands was significantly reduced in mosquitoes exposed to ATQ at 6 d pIBM  
508 ( $\chi^2$ ,  $n=125$ ,  $df=1$ ,  $X^2=7.190$ ,  $p=0.0073$ ). Median lines and values are indicated, “n” indicates the  
509 number of independent samples. To isolate Oocyst Prevalence and Oocyst Intensity, midgut samples  
510 with zero oocysts have been excluded from intensity analysis. Statistical significance is indicated  
511 where relevant as follows: ns=not significant, \* =  $p<0.05$ , \*\*= $p<0.01$ , \*\*\*= $p<0.001$ , \*\*\*\*= $p<0.0001$ .

Figure 4

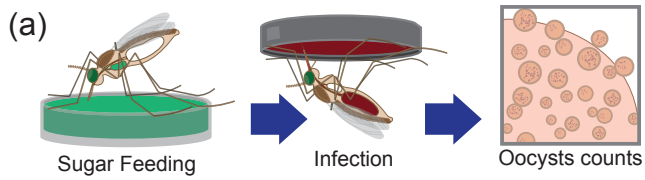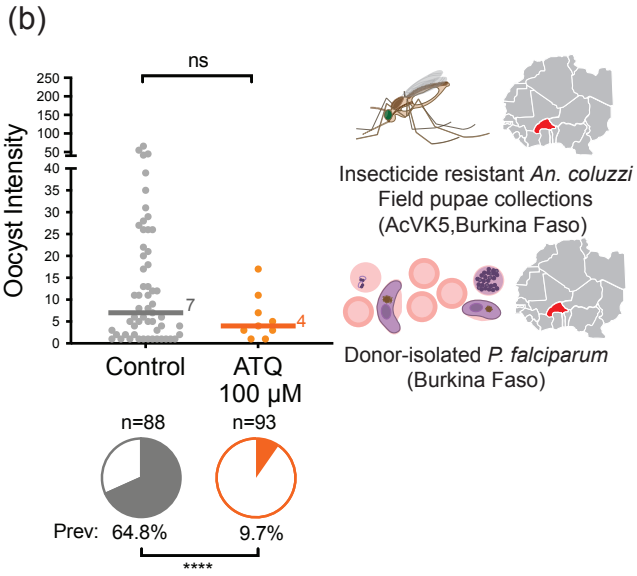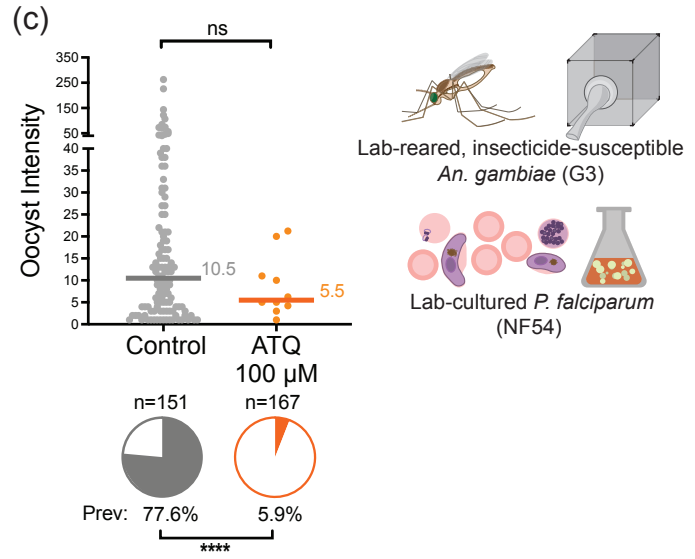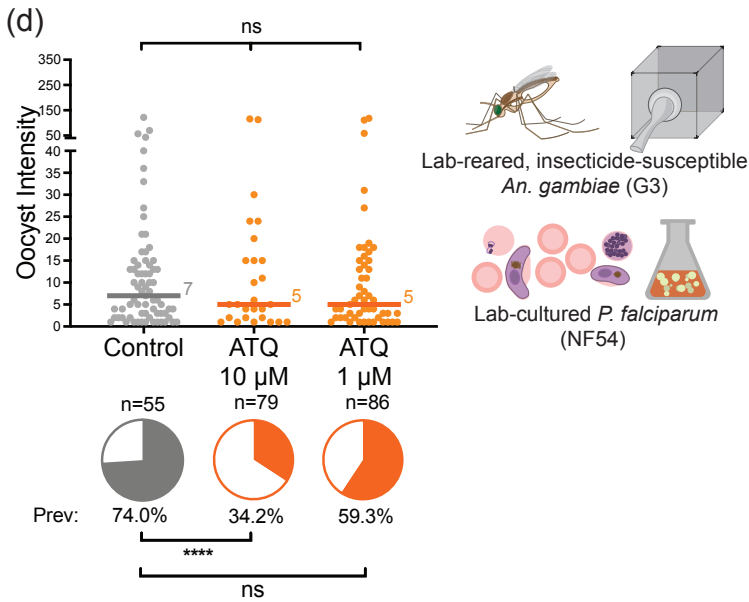

512 **Figure 4: Ingestion of an ATQ-glucose solution prior to *P. falciparum* infection significantly**  
513 **reduces transmission. (a)** Experimental scheme. **(b)** AcVK5, collected as pupae from field sites in  
514 Bama, Burkina Faso, mosquitoes were significantly less likely to become infected with *P. falciparum*  
515 (human gametocyte donor sample) after ingestion of 100  $\mu$ M ATQ/10% w/v glucose (access to treated  
516 sugar 24 h prior to infection). The proportion of AcVK5 mosquitoes infected with *P. falciparum*  
517 oocysts at 7 d pIBM was reduced from 64.8% in the control group, to 9.7% in mosquitoes given access  
518 to ATQ/sugar solution (85.0% reduction, GLM (Binomial;Logit), n=181, df=1,  $X^2= 59.242$ ,  
519  $p<0.0001$ ). While median intensity of infection in mosquitoes harboring  $\geq 1$  oocyst was reduced in  
520 ATQ-treated mosquitoes, this reduction was not significant. **(c)** Infection with culture adapted NF54  
521 *P. falciparum* in insecticide susceptible G3 *An. gambiae* produced remarkably similar results.  
522 Ingestion of 100  $\mu$ M ATQ/0.5% DMSO/10% w/v glucose (access to treated sugar 24 h prior to  
523 infection) significantly reduced the prevalence of infection at 7 d pIBM (92.4% reduction  $\text{Chi}^2$ , n=318,  
524  $\text{df}=1$ ,  $X^2=162.467$ ,  $p<0.0001$ ) but had no detectable effect on the median intensity of infection (Mann-  
525 Whitney, n=128,  $\text{df}=1$ ,  $U=480.5$ ,  $p=0.3364$ ). **(d)** Significant, dose-dependent inhibition of oocyst  
526 prevalence was observed with a 10-fold reduction in ATQ concentration (10  $\mu$ M:  $\text{Chi}^2$ , n=134,  $\text{df}=1$ ,  
527  $X^2=19.275$ ,  $p<0.0001$ ). A non-significant reduction in prevalence was also observed at 1  $\mu$ M ( $\text{Chi}^2$ ,  
528 n=141,  $\text{df}=1$ ,  $X^2=2.642$ ,  $p=0.1041$ ). Median lines and values are indicated, “n” indicates the number  
529 of independent samples. To isolate Oocyst Prevalence and Oocyst Intensity, midgut samples with zero  
530 oocysts have been excluded from intensity analysis. Statistical significance is indicated where relevant  
531 as follows: ns=not significant, \* =  $p<0.05$ , \*\*= $p<0.01$ , \*\*\*= $p<0.001$ , \*\*\*\*= $p<0.0001$ .

Figure 5

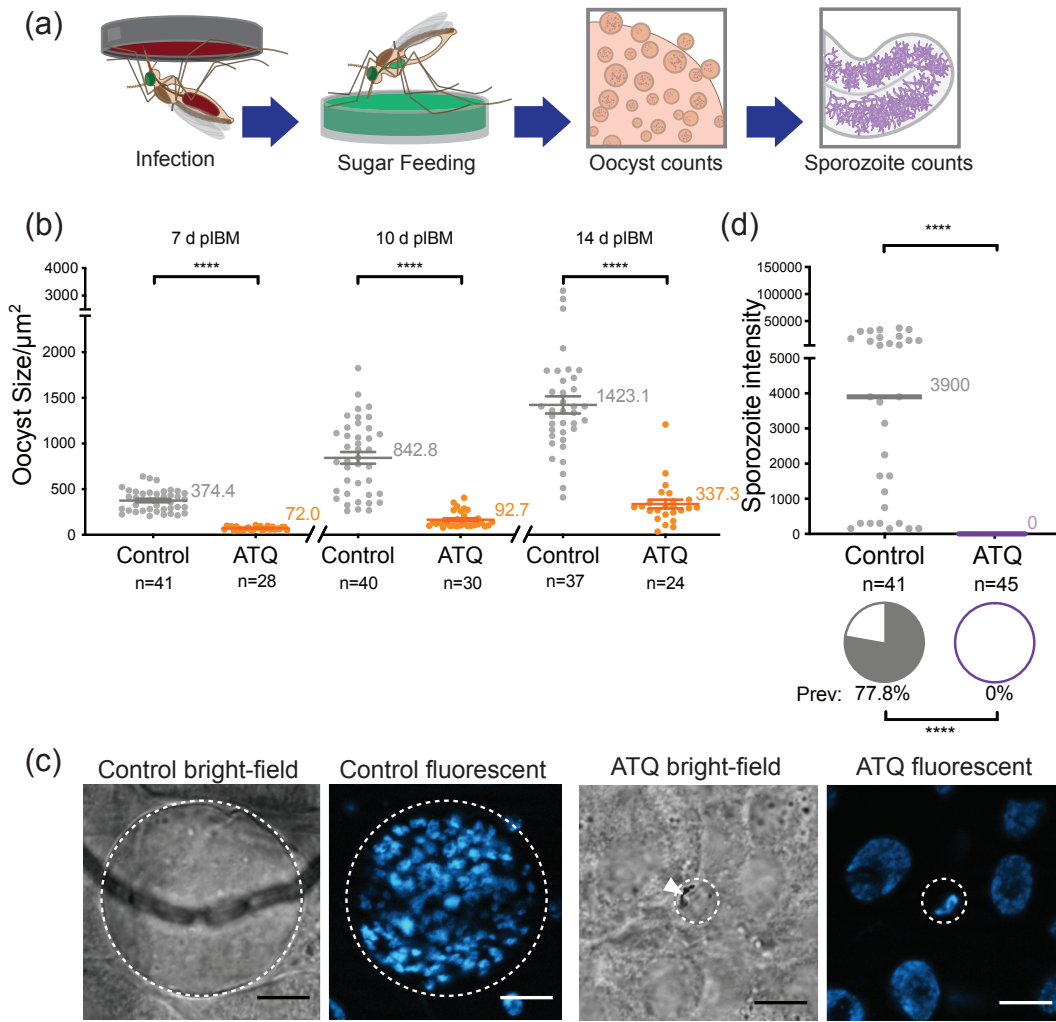

532 **Figure 5: Ingestion of ATQ-glucose after *P. falciparum* (NF54) infection blocks parasite**  
533 **development in *An. gambiae* (G3).** (a) Experimental scheme. (b) Oocyst size over time. Access to  
534 ATQ-glucose from 2 d pIBM caused a significant reduction in mean oocyst cross-sectional area  
535 (“size”/m<sup>2</sup>) relative to control at 7 d pIBM (2-way T-test, n=69, df=67,  $t=13.63$ ,  $p<0.0001$ ), 10 d pIBM  
536 (2-way T-test, n=70, df=68,  $t=8.998$ ,  $p<0.001$ ), and 14 d pIBM (2-way T-test, n=61, df=59,  $t=8.793$ ,  
537  $p<0.0001$ ). Means are indicated, error bars represent the standard error of the mean (SEM). (c)  
538 Example brightfield, and fluorescent micrographs of control and ATQ-exposed bright-field and DAPI-  
539 stained oocysts at 10 d pIBM (outline indicated by dashed line). At this timepoint, the control oocyst  
540 is large, and contains many discrete nuclear foci, indicating nuclear division and sporozoite  
541 differentiation. In contrast, the ATQ-exposed oocyst is small relative to control and contains a single  
542 nuclear focus. Dense hemozoin crystals (white triangle), typically associated with younger oocysts,  
543 are visible. Scale bars represent 10  $\mu\text{m}$ , (d) Salivary gland sporozoite prevalence and intensity at 14 d  
544 pIBM. No sporozoites (0% prevalence, median intensity = 0) were observed in salivary glands samples  
545 collected from mosquitoes given access to 100  $\mu\text{M}$  ATQ/0.5% DMSO/10% w/v glucose *ad libitum*  
546 ( $\chi^2$ , n=86, df=1,  $\chi^2=53.202$ ,  $p<0.0001$ ). Where relevant, median lines and values are indicated, “n”  
547 indicates the number of independent samples. To isolate Oocyst/Sporozoite Prevalence and  
548 Oocyst/Sporozoite Intensity, midgut samples with zero oocysts have been excluded from intensity  
549 analysis. Statistical significance is indicated where relevant as follows: ns=not significant, \* =  $p<0.05$ ,  
550 \*\*= $p<0.01$ , \*\*\*= $p<0.001$ , \*\*\*\*= $p<0.0001$ .

# Supplementary Figure 1

(a)

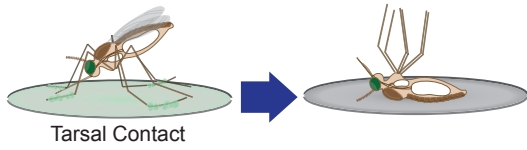

(b)

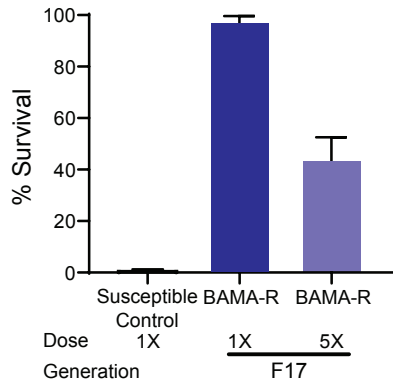

(c)

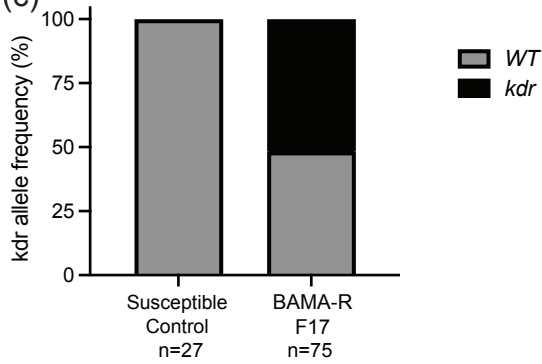

(d)

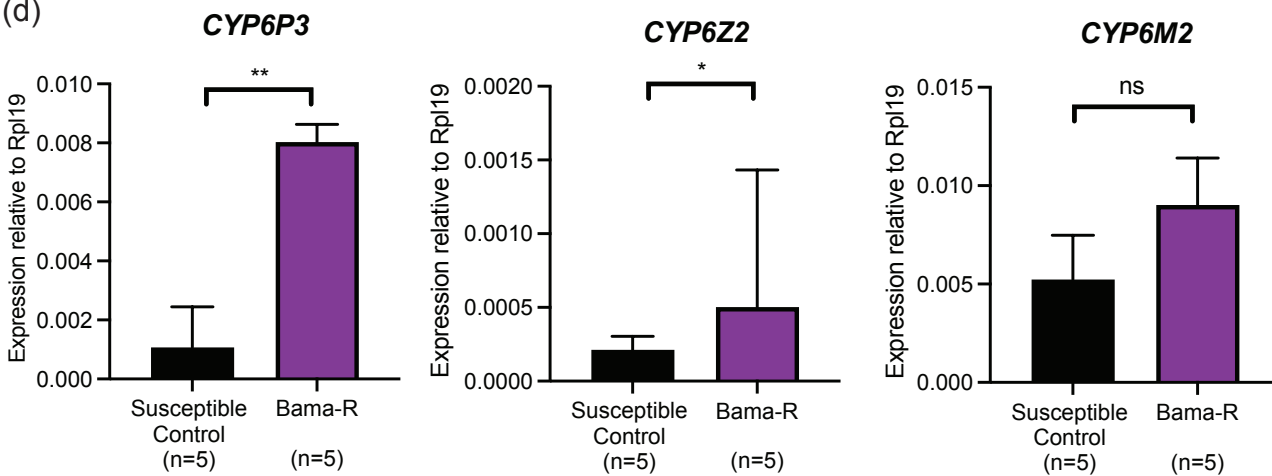



551 **Supplementary Figure 1: *An. gambiae* Bama-R mosquitoes are highly resistant to permethrin.**  
552 **(a)** Experimental scheme. **(b)** G3 females were 0% resistant at the DC, while 97% of exposed Bama-  
553 R females survived at the same dose, and 43% survived exposure to 5xDC, indicating extreme  
554 permethrin resistance. Mean survival  $\pm$  SEM from 3 replicates is indicated. **(c)** Bama-R mosquitoes  
555 are segregating for the *kdr* allele conferring target site resistance to pyrethroids. Allele frequency at  
556 generation F17 was 51.7% (n=75), indicating that the observed resistance phenotype is the result of  
557 additional modalities. **(d)** qPCR analysis shows that key cytochrome P450 genes associated with  
558 metabolic insecticide resistance are constitutively upregulated in Bama-R females compared to a  
559 susceptible control (G3). Median expression level normalized to the *Anopheles* housekeeping gene  
560 *rpl19* are shown, error bars represent the interquartile range (IQR). Expression levels for *Cyp6P3* and  
561 *Cyp6Z2* were significantly elevated compared to a phenotypically susceptible control (*Cyp6P3*, Mann-  
562 Whitney, n=10, df=1,  $U=0$ ,  $p=0.0079$ ; *Cyp6Z2*, Mann-Whitney, n=10, df=1,  $U=2$ ,  $p=0.0317$ ) while  
563 *Cyp6M2* was not significantly upregulated. Statistical significance is indicated where relevant as  
564 follows: ns=not significant, \* =  $p<0.05$ , \*\*= $p<0.01$ , \*\*\*= $p<0.001$ , \*\*\*\*= $p<0.0001$ .

## Supplementary Figure 2

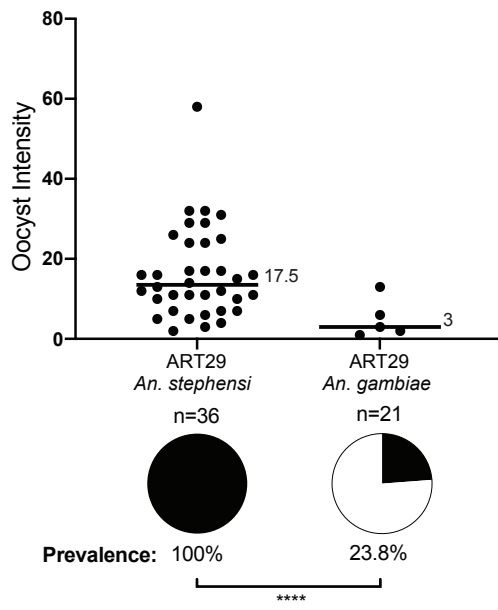

565 **Supplementary Figure 2: Development of the artemisinin-resistant *P. falciparum* parasite**  
566 **ART29 in *An. stephensi* and *An. gambiae*.** Female G3 (*An. gambiae*) and Anst (*An. stephensi*) were  
567 provided with a blood meal containing mature ART29 gametocytes. Outcome of infection was  
568 determined at 7 d pIBM by oocyst count. While ART29 exhibited poor infectivity in *An. gambiae*  
569 (23.8% infection prevalence), they established robust infections in *An. stephensi* (100% infection  
570 prevalence).

# Supplementary Figure 3

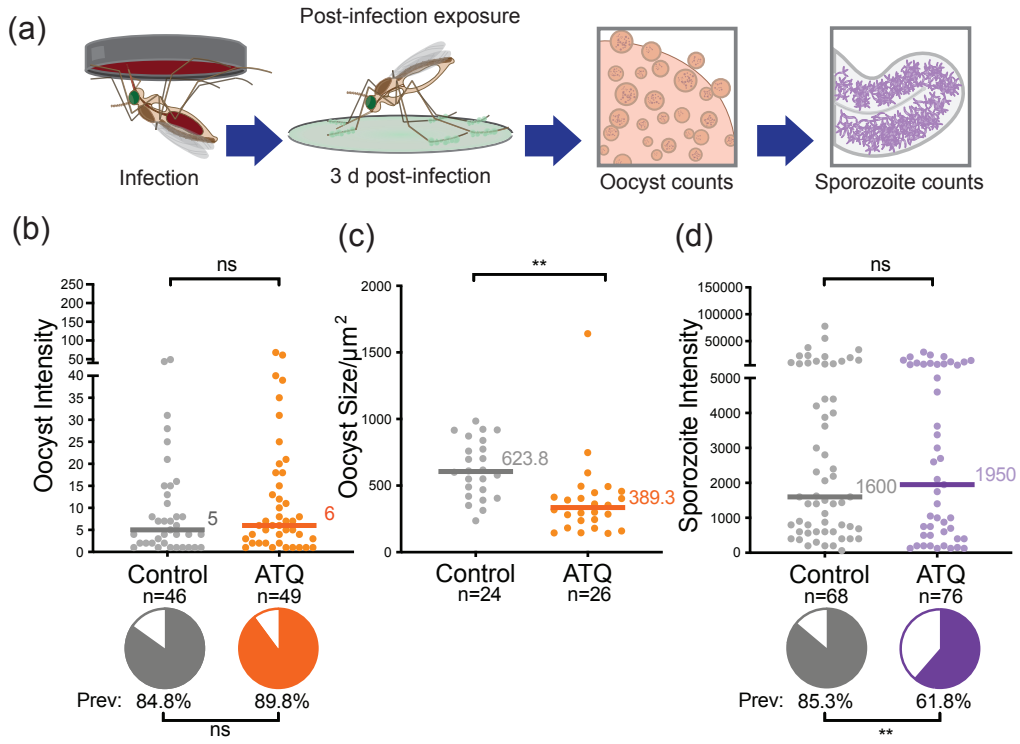

571 **Supplementary Figure 3: The proportion of *An. gambiae* mosquitoes with salivary gland**  
572 **sporozoites is significantly reduced after tarsal ATQ exposure at 3 d pIBM. (a)** Experimental  
573 scheme. **(b)** There was no effect of 3 d pIBM ATQ exposure on either prevalence (indicated by pie  
574 charts) or intensity (indicated by points) of infection determined at 10 d pIBM. Prevalence:  $\text{Chi}^2$ ,  $n=95$ ,  
575  $\text{df}=1$ ,  $X^2=0.540$ ,  $p=0.4623$ , intensity: Mann-Whitney,  $n=80$ ,  $\text{df}=1$ ,  $U=717.5$ ,  $p=0.4530$ . **(c)** ATQ  
576 exposure at 3 d pIBM significantly reduced the median cross-sectional area of oocysts at 7 d pIBM  
577 relative to control ( $\text{Chi}^2$ ,  $n=50$ ,  $\text{df}=1$ ,  $U=110$ ,  $p<0.0001$ ). **(d)** The prevalence, but not the median  
578 intensity of *P. falciparum* sporozoites in mosquito salivary glands was significantly reduced in  
579 mosquitoes exposed to ATQ at 3 d pIBM ( $\text{Chi}^2$ ,  $n=144$ ,  $\text{df}=1$ ,  $X^2=9.995$ ,  $p=0.0016$ ). Median lines and  
580 values are indicated, “n” indicates the number of independent samples. To isolate Oocyst/Sporozoite  
581 Prevalence and Oocyst/Sporozoite Intensity, midgut samples with zero oocysts have been excluded  
582 from intensity analysis. Statistical significance is indicated where relevant as follows: ns=not  
583 significant, \* =  $p<0.05$ , \*\*= $p<0.01$ , \*\*\*= $p<0.001$ , \*\*\*\*= $p<0.0001$ .

# Supplementary Figure 4

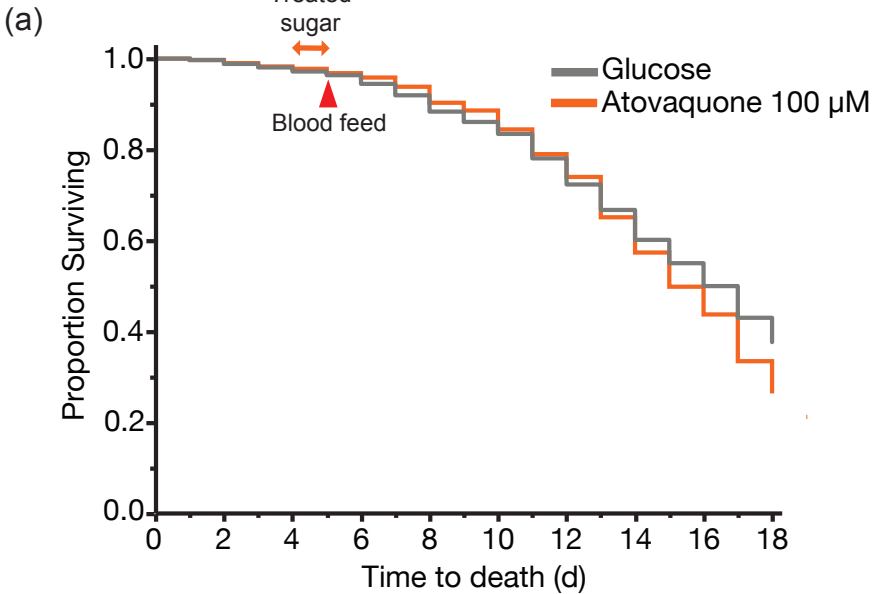

584 **Supplementary Figure 4: AcVK5 survival and infectivity after ingestion of ATQ/glucose. (a)**  
585 Survival prior to- and following 24 h access to 100  $\mu$ M/10% w/v Glucose/0.5 v/v/ DMSO (4 d post  
586 emergence, orange arrow), followed by *P. falciparum* (donor blood) infection (5 d post emergence,  
587 red arrow). Ingestion of ATQ/glucose had no impact on the survival of AcVK5 mosquitoes relative to  
588 a control group provided with 10% w/v glucose/0.5% v/v DMSO (Log-Rank Survival, n=1374, df=1,  
589  $X^2=1.3795$ ,  $p=0.2402$ ).

# Supplementary Figure 5

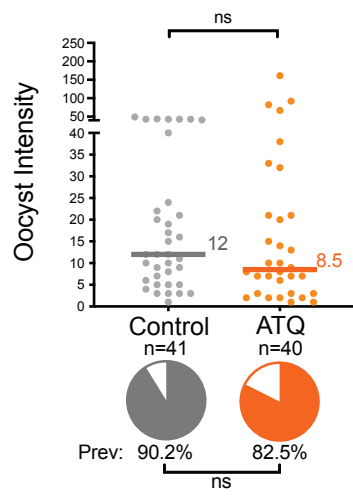



590 **Supplementary Figure 5: Ingestion of an ATQ-glucose solution after *P. falciparum* infection has**  
591 **no effect on oocyst prevalence or intensity.** There was no difference relative to controls in either  
592 intensity (n=68, df=1,  $U=495.5$ ,  $p=0.3257$ ) or prevalence (n=81, df=1,  $\chi^2=2.441$ ,  $p=0.1182$ ) of oocysts  
593 at 10 d pIBM in females with continued access to 100  $\mu$ M ATQ/0.5% DMSO/10% w/v glucose from  
594 2 d pIBM - 14 d pIBM. Median lines and values are indicated, “n” indicates the number of independent  
595 samples. To isolate Oocyst Prevalence and Oocyst Intensity, midgut samples with zero oocysts have  
596 been excluded from intensity analysis. Statistical significance is indicated where relevant as follows:  
597 ns=not significant, \* =  $p<0.05$ , \*\*= $p<0.01$ , \*\*\*= $p<0.001$ , \*\*\*\*= $p<0.0001$ .

## 598 References

- 599 1. World Malaria Report 2020. World Health Organisation. 2020.
- 600 2. Bhatt S, Weiss DJ, Cameron E, Bisanzio D, Mappin B, Dalrymple U, Battle K, Moyes CL, Henry A, Eckhoff  
601 PA, Wenger EA, Briet O, Penny MA, Smith TA, Bennett A, Yukich J, Eisele TP, Griffin JT, Fergus CA, Lynch M,  
602 Lindgren F, Cohen JM, Murray CLJ, Smith DL, Hay SI, Cibulskis RE, Gething PW. The effect of malaria control on  
603 Plasmodium falciparum in Africa between 2000 and 2015. *Nature*. 2015;526(7572):207-11. doi:  
604 10.1038/nature15535. PubMed PMID: 26375008; PMCID: PMC4820050.
- 605 3. Lin JT, Juliano JJ, Wongsrichanalai C. Drug-Resistant Malaria: The Era of ACT. *Curr Infect Dis Rep*.  
606 2010;12(3):165-73. Epub 2011/02/11. doi: 10.1007/s11908-010-0099-y. PubMed PMID: 21308525; PMCID:  
607 PMC3058555.
- 608 4. Ogbonna A, Uneke CJ. Artemisinin-based combination therapy for uncomplicated malaria in sub-  
609 Saharan Africa: the efficacy, safety, resistance and policy implementation since Abuja 2000. *Trans R Soc Trop*  
610 *Med Hyg*. 2008;102(7):621-7. Epub 2008/05/24. doi: 10.1016/j.trstmh.2008.03.024. PubMed PMID:  
611 18499204.
- 612 5. Ashley EA, Dhorda M, Fairhurst RM, Amaratunga C, Lim P, Suon S, Sreng S, Anderson JM, Mao S, Sam  
613 B, Sopha C, Chuor CM, Nguon C, Sovannaroeth S, Pukrittayakamee S, Jittamala P, Chotivanich K, Chutasmit K,  
614 Suchatsoonthorn C, Runchaoren R, Hien TT, Thuy-Nhien NT, Thanh NV, Phu NH, Htut Y, Han KT, Aye KH,  
615 Mokuolu OA, Olaosebikan RR, Folaranmi OO, Mayxay M, Khanthavong M, Hongvanthong B, Newton PN,  
616 Onyamboko MA, Fanello CI, Tshefu AK, Mishra N, Valecha N, Phyo AP, Nosten F, Yi P, Tripura R, Borrmann S,  
617 Bashraheil M, Peshu J, Faiz MA, Ghose A, Hossain MA, Samad R, Rahman MR, Hasan MM, Islam A, Miotto O,  
618 Amato R, MacInnis B, Stalker J, Kwiatkowski DP, Bozdech Z, Jeeyapant A, Cheah PY, Sakulthaew T, Chalk J,  
619 Intharabut B, Silamut K, Lee SJ, Vihokhern B, Kunasol C, Imwong M, Tarning J, Taylor WJ, Yeung S, Woodrow  
620 CJ, Flegg JA, Das D, Smith J, Venkatesan M, Plowe CV, Stepniewska K, Guerin PJ, Dondorp AM, Day NP, White  
621 NJ, Tracking Resistance to Artemisinin C. Spread of artemisinin resistance in Plasmodium falciparum malaria.  
622 *N Engl J Med*. 2014;371(5):411-23. Epub 2014/07/31. doi: 10.1056/NEJMoa1314981. PubMed PMID:  
623 25075834; PMCID: PMC4143591.
- 624 6. Staedke SG, Gonahasa S, Dorsey G, Kanya MR, Maiteki-Sebuguzi C, Lynd A, Katureebe A, Kyohere M,  
625 Mutungi P, Kigozi SP, Opigo J, Hemingway J, Donnelly MJ. Effect of long-lasting insecticidal nets with and  
626 without piperonyl butoxide on malaria indicators in Uganda (LLINEUP): a pragmatic, cluster-randomised trial  
627 embedded in a national LLIN distribution campaign. *Lancet*. 2020;395(10232):1292-303. Epub 2020/04/20.  
628 doi: 10.1016/S0140-6736(20)30214-2. PubMed PMID: 32305094; PMCID: PMC7181182.
- 629 7. Amaratunga C, Lim P, Suon S, Sreng S, Mao S, Sopha C, Sam B, Dek D, Try V, Amato R, Blessborn D,  
630 Song L, Tullo GS, Fay MP, Anderson JM, Tarning J, Fairhurst RM. Dihydroartemisinin-piperaquine resistance in  
631 Plasmodium falciparum malaria in Cambodia: a multisite prospective cohort study. *The Lancet Infectious*  
632 *diseases*. 2016;16(3):357-65. doi: 10.1016/S1473-3099(15)00487-9. PubMed PMID: 26774243; PMCID:  
633 4792715.
- 634 8. Balikagala B, Fukuda N, Ikeda M, Katuro OT, Tachibana SI, Yamauchi M, Opio W, Emoto S, Anywar DA,  
635 Kimura E, Palacpac NMQ, Odongo-Aginya EI, Ogwang M, Horii T, Mita T. Evidence of Artemisinin-Resistant  
636 Malaria in Africa. *N Engl J Med*. 2021;385(13):1163-71. Epub 2021/09/23. doi: 10.1056/NEJMoa2101746.  
637 PubMed PMID: 34551228.
- 638 9. Toé KH, Jones CM, N'Fale S, Ismail HM, Dabiré RK, Ranson H. Increased Pyrethroid Resistance in  
639 Malaria Vectors and Decreased Bed Net Effectiveness, Burkina Faso. *Emerging Infectious Diseases*.  
640 2014;20(10):1691-6. doi: 10.3201/eid2010.140619. PubMed PMID: PMC4193182.
- 641 10. Samantsidis GR, Panteleri R, Denecke S, Kounadi S, Christou I, Nauen R, Douris V, Vontas J. 'What I  
642 cannot create, I do not understand': functionally validated synergism of metabolic and target site insecticide  
643 resistance. *Proc Biol Sci*. 2020;287(1927):20200838. Epub 2020/05/27. doi: 10.1098/rspb.2020.0838. PubMed  
644 PMID: 32453986; PMCID: PMC7287358.
- 645 11. Balabanidou V, Kampouraki A, MacLean M, Blomquist GJ, Tittiger C, Juarez MP, Mijailovsky SJ,  
646 Chalepakis G, Anthousi A, Lynd A, Antoine S, Hemingway J, Ranson H, Lycett GJ, Vontas J. Cytochrome P450  
647 associated with insecticide resistance catalyzes cuticular hydrocarbon production in *Anopheles gambiae*. *Proc*

- 648 Natl Acad Sci U S A. 2016;113(33):9268-73. doi: 10.1073/pnas.1608295113. PubMed PMID: 27439866; PMCID:  
649 PMC4995928.
- 650 12. Ranson H, Jensen B, Vulule JM, Wang X, Hemingway J, Collins FH. Identification of a point mutation in  
651 the voltage-gated sodium channel gene of Kenyan *Anopheles gambiae* associated with resistance to DDT and  
652 pyrethroids. *Insect Mol Biol.* 2000;9(5):491-7. Epub 2000/10/13. doi: 10.1046/j.1365-2583.2000.00209.x.  
653 PubMed PMID: 11029667.
- 654 13. Stevenson BJ, Bibby J, Pignatelli P, Muangnoicharoen S, O'Neill PM, Lian LY, Muller P, Nikou D, Steven  
655 A, Hemingway J, Sutcliffe MJ, Paine MJ. Cytochrome P450 6M2 from the malaria vector *Anopheles gambiae*  
656 metabolizes pyrethroids: Sequential metabolism of deltamethrin revealed. *Insect Biochem Mol Biol.*  
657 2011;41(7):492-502. Epub 2011/02/18. doi: 10.1016/j.ibmb.2011.02.003. PubMed PMID: 21324359.
- 658 14. Tacoli C, Gai PP, Bayingana C, Sift K, Geus D, Ndoli J, Sendegya A, Gahutu JB, Mockenhaupt FP.  
659 Artemisinin Resistance-Associated K13 Polymorphisms of *Plasmodium falciparum* in Southern Rwanda, 2010-  
660 2015. *Am J Trop Med Hyg.* 2016;95(5):1090-3. Epub 2016/11/04. doi: 10.4269/ajtmh.16-0483. PubMed PMID:  
661 27573632; PMCID: PMC5094222.
- 662 15. Bwire GM, Ngasala B, Mikomangwa WP, Kilonzi M, Kamuhabwa AAR. Detection of mutations  
663 associated with artemisinin resistance at k13-propeller gene and a near complete return of chloroquine  
664 susceptible *falciparum* malaria in Southeast of Tanzania. *Sci Rep.* 2020;10(1):3500. Epub 2020/02/28. doi:  
665 10.1038/s41598-020-60549-7. PubMed PMID: 32103124; PMCID: PMC7044163.
- 666 16. Uwimana A, Legrand E, Stokes BH, Ndikumana JM, Warsame M, Umulisa N, Ngamije D, Munyaneza T,  
667 Mazarati JB, Munguti K, Campagne P, Criscuolo A, Arie F, Murindahabi M, Ringwald P, Fidock DA,  
668 Mbituyumuremyi A, Menard D. Emergence and clonal expansion of in vitro artemisinin-resistant *Plasmodium*  
669 *falciparum* kelch13 R561H mutant parasites in Rwanda. *Nat Med.* 2020;26(10):1602-8. Epub 2020/08/05. doi:  
670 10.1038/s41591-020-1005-2. PubMed PMID: 32747827; PMCID: PMC7541349.
- 671 17. Asua V, Conrad MD, Aydemir O, Duval Saint M, Legac J, Duarte E, Tumwebaze P, Chin DM, Cooper RA,  
672 Yeka A, Kanya MR, Dorsey G, Nsobya SL, Bailey J, Rosenthal PJ. Changing Prevalence of Potential Mediators  
673 of Aminoquinoline, Antifolate, and Artemisinin Resistance Across Uganda. *J Infect Dis.* 2021;223(6):985-94.  
674 Epub 2020/11/05. doi: 10.1093/infdis/jiaa687. PubMed PMID: 33146722; PMCID: PMC8006419.
- 675 18. Uwimana A, Umulisa N, Venkatesan M, Svigel SS, Zhou Z, Munyaneza T, Habimana RM, Rucogoza A,  
676 Moriarty LF, Sandford R, Piercefield E, Goldman I, Ezema B, Talundzic E, Pacheco MA, Escalante AA, Ngamije  
677 D, Mangala JN, Kabera M, Munguti K, Murindahabi M, Brieger W, Musanabaganwa C, Mutesa L, Udhayakumar  
678 V, Mbituyumuremyi A, Halsey ES, Lucchi NW. Association of *Plasmodium falciparum* kelch13 R561H genotypes  
679 with delayed parasite clearance in Rwanda: an open-label, single-arm, multicentre, therapeutic efficacy study.  
680 *The Lancet Infectious diseases.* 2021;21(8):1120-8. Epub 2021/04/18. doi: 10.1016/S1473-3099(21)00142-0.  
681 PubMed PMID: 33864801.
- 682 19. Straimer J, Gandhi P, Renner KC, Schmitt EK. High prevalence of *P. falciparum* K13 mutations in  
683 Rwanda is associated with slow parasite clearance after treatment with artemether-lumefantrine. *J Infect Dis.*  
684 2021. Epub 2021/07/04. doi: 10.1093/infdis/jiab352. PubMed PMID: 34216470.
- 685 20. Sinka ME, Pironon S, Massey NC, Longbottom J, Hemingway J, Moyes CL, Willis KJ. A new malaria  
686 vector in Africa: Predicting the expansion range of *Anopheles stephensi* and identifying the urban populations  
687 at risk. *Proceedings of the National Academy of Sciences of the United States of America.* 2020;117(40):24900-  
688 8. Epub 2020/09/16. doi: 10.1073/pnas.2003976117. PubMed PMID: 32929020; PMCID: PMC7547157.
- 689 21. Sherrard-Smith E, Skarp JE, Beale AD, Fornadel C, Norris LC, Moore SJ, Mihreteab S, Charlwood JD,  
690 Bhatt S, Winskill P, Griffin JT, Churcher TS. Mosquito feeding behavior and how it influences residual malaria  
691 transmission across Africa. *Proceedings of the National Academy of Sciences of the United States of America.*  
692 2019;116(30):15086-95. Epub 2019/07/10. doi: 10.1073/pnas.1820646116. PubMed PMID: 31285346;  
693 PMCID: PMC6660788.
- 694 22. Fraser KJ, Mwandigha L, Traore SF, Traore MM, Doumbia S, Junnila A, Revay E, Beier JC, Marshall JM,  
695 Ghani AC, Muller G. Estimating the potential impact of Attractive Targeted Sugar Baits (ATSBs) as a new vector  
696 control tool for *Plasmodium falciparum* malaria. *Malar J.* 2021;20(1):151. Epub 2021/03/19. doi:  
697 10.1186/s12936-021-03684-4. PubMed PMID: 33731111; PMCID: PMC7968277.

- 698 23. Muller GC, Beier JC, Traore SF, Toure MB, Traore MM, Bah S, Doumbia S, Schlein Y. Successful field  
699 trial of attractive toxic sugar bait (ATSB) plant-spraying methods against malaria vectors in the *Anopheles*  
700 *gambiae* complex in Mali, West Africa. *Malar J.* 2010;9:210. Epub 2010/07/29. doi: 10.1186/1475-2875-9-210.  
701 PubMed PMID: 20663142; PMCID: PMC2914067.
- 702 24. Beier JC, Muller GC, Gu W, Arheart KL, Schlein Y. Attractive toxic sugar bait (ATSB) methods decimate  
703 populations of *Anopheles* malaria vectors in arid environments regardless of the local availability of favoured  
704 sugar-source blossoms. *Malar J.* 2012;11:31. doi: 10.1186/1475-2875-11-31. PubMed PMID: 22297155;  
705 PMCID: PMC3293779.
- 706 25. Paton DG, Childs LM, Itoe MA, Holmdahl IE, Buckee CO, Catteruccia F. Exposing *Anopheles* mosquitoes  
707 to antimalarials blocks *Plasmodium* parasite transmission. *Nature.* 2019;567(7747):239-43. Epub 2019/03/01.  
708 doi: 10.1038/s41586-019-0973-1. PubMed PMID: 30814727.
- 709 26. Adams KL, Sawadogo SP, Nignan C, Niang A, Paton DG, Robert Shaw W, South A, Wang J, Itoe MA,  
710 Werling K, Dabire RK, Diabate A, Catteruccia F. Cuticular hydrocarbons are associated with mating success and  
711 insecticide resistance in malaria vectors. *Commun Biol.* 2021;4(1):911. Epub 2021/07/28. doi:  
712 10.1038/s42003-021-02434-1. PubMed PMID: 34312484; PMCID: PMC8313523.
- 713 27. Kwiatkowska RM, Platt N, Poupardin R, Irving H, Dabire RK, Mitchell S, Jones CM, Diabate A, Ranson  
714 H, Wondji CS. Dissecting the mechanisms responsible for the multiple insecticide resistance phenotype in  
715 *Anopheles gambiae* s.s., M form, from Vallee du Kou, Burkina Faso. *Gene.* 2013;519(1):98-106. Epub  
716 2013/02/06. doi: 10.1016/j.gene.2013.01.036. PubMed PMID: 23380570; PMCID: PMC3611593.
- 717 28. Kaneko O, Kimura M, Kawamoto F, Ferreira MU, Tanabe K. *Plasmodium falciparum*: allelic variation in  
718 the merozoite surface protein 1 gene in wild isolates from southern Vietnam. *Exp Parasitol.* 1997;86(1):45-57.  
719 doi: 10.1006/expr.1997.4147. PubMed PMID: 9149240.
- 720 29. Knols BG, Farenhorst M, Andriessen R, Snetselaar J, Suer RA, Osinga AJ, Knols JM, Deschietere J,  
721 Ng'habi KR, Lyimo IN, Kessy ST, Mayagaya VS, Sperling S, Cordel M, Sternberg ED, Hartmann P, Mnyone LL,  
722 Rose A, Thomas MB. Eave tubes for malaria control in Africa: an introduction. *Malar J.* 2016;15(1):404. Epub  
723 2016/08/16. doi: 10.1186/s12936-016-1452-x. PubMed PMID: 27515306; PMCID: PMC4982263.
- 724 30. Shaw WR, Holmdahl IE, Itoe MA, Werling K, Marquette M, Paton DG, Singh N, Buckee CO, Childs LM,  
725 Catteruccia F. Multiple blood feeding in mosquitoes shortens the *Plasmodium falciparum* incubation period  
726 and increases malaria transmission potential. *PLoS Pathog.* 2020;16(12):e1009131. Epub 2021/01/01. doi:  
727 10.1371/journal.ppat.1009131. PubMed PMID: 33382824; PMCID: PMC7774842.
- 728 31. Soulama I, Nebie I, Ouedraogo A, Gansane A, Diarra A, Tiono AB, Bougouma EC, Konate AT, Kabre GB,  
729 Taylor WR, Sirima SB. *Plasmodium falciparum* genotypes diversity in symptomatic malaria of children living in  
730 an urban and a rural setting in Burkina Faso. *Malar J.* 2009;8:135. Epub 2009/06/24. doi: 10.1186/1475-2875-  
731 8-135. PubMed PMID: 19545390; PMCID: PMC2705376.
- 732 32. Sondo P, Derra K, Rouamba T, Nakanabo Diallo S, Taconet P, Kazienga A, Ilboudo H, Tahita MC, Valea  
733 I, Sorgho H, Lefevre T, Tinto H. Determinants of *Plasmodium falciparum* multiplicity of infection and genetic  
734 diversity in Burkina Faso. *Parasit Vectors.* 2020;13(1):427. Epub 2020/08/21. doi: 10.1186/s13071-020-04302-  
735 z. PubMed PMID: 32819420; PMCID: PMC7441709.
- 736 33. Mitchell SN, Stevenson BJ, Muller P, Wilding CS, Egyir-Yawson A, Field SG, Hemingway J, Paine MJ,  
737 Ranson H, Donnelly MJ. Identification and validation of a gene causing cross-resistance between insecticide  
738 classes in *Anopheles gambiae* from Ghana. *Proc Natl Acad Sci U S A.* 2012;109(16):6147-52. doi:  
739 10.1073/pnas.1203452109. PubMed PMID: 22460795; PMCID: PMC3341073.
- 740 34. Lees RS, Ismail HM, Logan RAE, Malone D, Davies R, Anthousi A, Adolphi A, Lycett GJ, Paine MJI. New  
741 insecticide screening platforms indicate that Mitochondrial Complex I inhibitors are susceptible to cross-  
742 resistance by mosquito P450s that metabolise pyrethroids. *Sci Rep.* 2020;10(1):16232. doi: 10.1038/s41598-  
743 020-73267-x. PubMed PMID: 33004954; PMCID: PMC7530702.
- 744 35. Musset L, Bouchaud O, Matheron S, Massias L, Le Bras J. Clinical atovaquone-proguanil resistance of  
745 *Plasmodium falciparum* associated with cytochrome b codon 268 mutations. *Microbes Infect.*  
746 2006;8(11):2599-604. doi: 10.1016/j.micinf.2006.07.011. PubMed PMID: 16962361.
- 747 36. Bopp SE, Manary MJ, Bright AT, Johnston GL, Dharia NV, Luna FL, McCormack S, Plouffe D, McNamara  
748 CW, Walker JR, Fidock DA, Denchi EL, Winzeler EA. Mitotic evolution of *Plasmodium falciparum* shows a stable

- 749 core genome but recombination in antigen families. *PLoS Genet.* 2013;9(2):e1003293. doi:  
750 10.1371/journal.pgen.1003293. PubMed PMID: 23408914; PMCID: PMC3567157.
- 751 37. Goodman CD, Siregar JE, Mollard V, Vega-Rodriguez J, Syafruddin D, Matsuoka H, Matsuzaki M,  
752 Toyama T, Sturm A, Cozijnsen A, Jacobs-Lorena M, Kita K, Marzuki S, McFadden GI. Parasites resistant to the  
753 antimalarial atovaquone fail to transmit by mosquitoes. *Science.* 2016;352(6283):349-53. doi:  
754 10.1126/science.aad9279. PubMed PMID: 27081071; PMCID: PMC5149070.
- 755 38. Blake LD, Johnson ME, Siegel SV, McQueen A, Iyamu ID, Shaikh AK, Shultis MW, Manetsch R, Kyle DE.  
756 Menocone Resistance in Malaria Parasites Is Conferred by M133I Mutations in Cytochrome b That Are  
757 Transmissible through Mosquitoes. *Antimicrob Agents Chemother.* 2017;61(8). doi: 10.1128/AAC.00689-17.  
758 PubMed PMID: 28584157; PMCID: PMC5527649.
- 759 39. Siegel S, Rivero A, Adapa SR, Wang C, Manetsch R, Jiang RHY, Kyle DE. Mitochondrial heteroplasmy is  
760 responsible for Atovaquone drug resistance in *Plasmodium falciparum*. *bioRxiv.* 2017:232033. doi:  
761 10.1101/232033.
- 762 40. Bopp S, Magistrado P, Wong W, Schaffner SF, Mukherjee A, Lim P, Dhorda M, Amaratunga C, Woodrow  
763 CJ, Ashley EA, White NJ, Dondorp AM, Fairhurst RM, Arieu F, Menard D, Wirth DF, Volkman SK. Plasmepsin II-  
764 III copy number accounts for bimodal piperazine resistance among Cambodian *Plasmodium falciparum*. *Nat*  
765 *Commun.* 2018;9(1):1769. Epub 2018/05/04. doi: 10.1038/s41467-018-04104-z. PubMed PMID: 29720620;  
766 PMCID: PMC5931971.
- 767 41. Graumans W, Jacobs E, Bousema T, Sinnis P. When Is a *Plasmodium*-Infected Mosquito an Infectious  
768 Mosquito? *Trends Parasitol.* 2020;36(8):705-16. doi: 10.1016/j.pt.2020.05.011. PubMed PMID: 32620501;  
769 PMCID: PMC7386819.
- 770 42. Sinden RE, Billingsley PF. *Plasmodium* invasion of mosquito cells: hawk or dove? *Trends Parasitol.*  
771 2001;17(5):209-12. doi: 10.1016/s1471-4922(01)01928-6. PubMed PMID: 11323288.
- 772 43. Smith RC, Vega-Rodriguez J, Jacobs-Lorena M. The *Plasmodium* bottleneck: malaria parasite losses in  
773 the mosquito vector. *Mem Inst Oswaldo Cruz.* 2014;109(5):644-61. PubMed PMID: 25185005; PMCID:  
774 PMC4156458.
- 775 44. Burrows J, Fidock DA, Miller RS, Rees S. Blocking *Plasmodium* Development in Mosquitoes: A Powerful  
776 New Approach for Expanding Malaria Control Efforts. *Am J Trop Med Hyg.* 2019;101(4):734-5. Epub  
777 2019/07/03. doi: 10.4269/ajtmh.19-0318. PubMed PMID: 31264564; PMCID: PMC6779223.
- 778 45. Kessler S, Vlimant M, Guerin PM. The sugar meal of the African malaria mosquito *Anopheles gambiae*  
779 and how deterrent compounds interfere with it: a behavioural and neurophysiological study. *J Exp Biol.*  
780 2013;216(Pt 7):1292-306. Epub 2012/12/25. doi: 10.1242/jeb.076588. PubMed PMID: 23264482.
- 781 46. Qualls WA, Muller GC, Traore SF, Traore MM, Arheart KL, Doumbia S, Schlein Y, Kravchenko VD, Xue  
782 RD, Beier JC. Indoor use of attractive toxic sugar bait (ATSB) to effectively control malaria vectors in Mali, West  
783 Africa. *Malar J.* 2015;14:301. Epub 2015/08/06. doi: 10.1186/s12936-015-0819-8. PubMed PMID: 26242186;  
784 PMCID: PMC4524285.
- 785 47. Hien D, Pare PSL, Cooper A, Koama BK, Guissou E, Yameogo KB, Yerbanga RS, Farrell IW, Ouedraogo  
786 JB, Gnankine O, Ignell R, Cohuet A, Dabire RK, Stevenson PC, Lefevre T. Contrasting effects of the alkaloid  
787 ricinine on the capacity of *Anopheles gambiae* and *Anopheles coluzzii* to transmit *Plasmodium falciparum*.  
788 *Parasit Vectors.* 2021;14(1):479. doi: 10.1186/s13071-021-04992-z. PubMed PMID: 34526119; PMCID:  
789 PMC8444468.
- 790 48. Paaijmans K, Fernandez-Busquets X. Antimalarial drug delivery to the mosquito: an option worth  
791 exploring? *Future Microbiol.* 2014;9(5):579-82. doi: 10.2217/fmb.14.30. PubMed PMID: 24957084.
- 792 49. Ferreira TN, Pita-Pereira D, Costa SG, Brazil RP, Moraes CS, Diaz-Albiter HM, Genta FA. Transmission  
793 blocking sugar baits for the control of *Leishmania* development inside sand flies using environmentally friendly  
794 beta-glycosides and their aglycones. *Parasit Vectors.* 2018;11(1):614. doi: 10.1186/s13071-018-3122-z.  
795 PubMed PMID: 30501613; PMCID: PMC6271627.
- 796 50. Srivastava IK, Rottenberg H, Vaidya AB. Atovaquone, a broad spectrum antiparasitic drug, collapses  
797 mitochondrial membrane potential in a malarial parasite. *J Biol Chem.* 1997;272(7):3961-6. PubMed PMID:  
798 9020100.

- 799 51. Painter HJ, Morrisey JM, Mather MW, Vaidya AB. Specific role of mitochondrial electron transport in  
800 blood-stage *Plasmodium falciparum*. *Nature*. 2007;446(7131):88-91. doi: 10.1038/nature05572. PubMed  
801 PMID: 17330044.
- 802 52. Ke H, Lewis IA, Morrisey JM, McLean KJ, Ganesan SM, Painter HJ, Mather MW, Jacobs-Lorena M, Llinas  
803 M, Vaidya AB. Genetic investigation of tricarboxylic acid metabolism during the *Plasmodium falciparum* life  
804 cycle. *Cell Rep*. 2015;11(1):164-74. doi: 10.1016/j.celrep.2015.03.011. PubMed PMID: 25843709; PMCID:  
805 PMC4394047.
- 806 53. Boysen KE, Matuschewski K. Arrested oocyst maturation in *Plasmodium* parasites lacking type II  
807 NADH:ubiquinone dehydrogenase. *J Biol Chem*. 2011;286(37):32661-71. doi: 10.1074/jbc.M111.269399.  
808 PubMed PMID: 21771793; PMCID: PMC3173203.
- 809 54. Hino A, Hirai M, Tanaka TQ, Watanabe Y, Matsuoka H, Kita K. Critical roles of the mitochondrial  
810 complex II in oocyst formation of rodent malaria parasite *Plasmodium berghei*. *J Biochem*. 2012;152(3):259-  
811 68. doi: 10.1093/jb/mvs058. PubMed PMID: 22628552.
- 812 55. Sturm A, Mollard V, Cozijnsen A, Goodman CD, McFadden GI. Mitochondrial ATP synthase is  
813 dispensable in blood-stage *Plasmodium berghei* rodent malaria but essential in the mosquito phase. *Proc Natl*  
814 *Acad Sci U S A*. 2015;112(33):10216-23. doi: 10.1073/pnas.1423959112. PubMed PMID: 25831536; PMCID:  
815 PMC4547259.
- 816 56. Terzian LA, Stahler N, Dawkins AT, Jr. The sporogonous of *Plasmodium vivax* in *Anopheles* mosquitoes  
817 as a system for evaluating the prophylactic and curative capabilities of potential antimalarial compounds. *Exp*  
818 *Parasitol*. 1968;23(1):56-66. doi: 10.1016/0014-4894(68)90042-8. PubMed PMID: 4876903.
- 819 57. Mukherjee A, Bopp S, Magistrado P, Wong W, Daniels R, Demas A, Schaffner S, Amaratunga C, Lim P,  
820 Dhorda M, Miotto O, Woodrow C, Ashley EA, Dondorp AM, White NJ, Wirth D, Fairhurst R, Volkman SK.  
821 Artemisinin resistance without pfcKelch13 mutations in *Plasmodium falciparum* isolates from Cambodia. *Malar*  
822 *J*. 2017;16(1):195. Epub 2017/05/13. doi: 10.1186/s12936-017-1845-5. PubMed PMID: 28494763; PMCID:  
823 PMC5427620.
- 824 58. Marcenac P, Shaw WR, Kakani EG, Mitchell SN, South A, Werling K, Marrogi E, Abernathy DG, Yerbanga  
825 RS, Dabire RK, Diabate A, Lefevre T, Catteruccia F. A mating-induced reproductive gene promotes *Anopheles*  
826 tolerance to *Plasmodium falciparum* infection. *PLoS Pathog*. 2020;16(12):e1008908. Epub 2020/12/22. doi:  
827 10.1371/journal.ppat.1008908. PubMed PMID: 33347501; PMCID: PMC7785212.
- 828 59. Trager W, Jensen JB. Human malaria parasites in continuous culture. *Science*. 1976;193(4254):673-5.  
829 Epub 1976/08/20. doi: 10.1126/science.781840. PubMed PMID: 781840.
- 830 60. Ifediba T, Vanderberg JP. Complete in vitro maturation of *Plasmodium falciparum* gametocytes.  
831 *Nature*. 1981;294(5839):364-6. Epub 1981/11/26. PubMed PMID: 7031476.
- 832 61. Snounou G, Viriyakosol S, Zhu XP, Jarra W, Pinheiro L, do Rosario VE, Thaithong S, Brown KN. High  
833 sensitivity of detection of human malaria parasites by the use of nested polymerase chain reaction. *Mol*  
834 *Biochem Parasitol*. 1993;61(2):315-20. PubMed PMID: 8264734.

835
